# Supplementary material for: Nucleophilic functionalization of thianthrenium salts under basic conditions
Source: publisher site journal article supplement (doi:10.3762/bjoc.20.26), 2024-02-08
Supplement: Additional file 1 [file 1860-5397-20-26-S1.pdf]

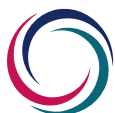

## Supporting Information

for

### **Nucleophilic functionalization of thianthrenium salts under basic conditions**

Xinting Fan, Duo Zhang, Xiangchuan Xiu, Bin Xu, Yu Yuan, Feng Chen and Pan Gao

*Beilstein J. Org. Chem.* **2024**, *20*, 257–263. [doi:10.3762/bjoc.20.26](https://doi.org/10.3762/bjoc.20.26)

### **Experimental procedures, characterization data for all new compounds, and NMR spectra of products**

## Table of contents

|                                                                                |     |
|--------------------------------------------------------------------------------|-----|
| 1. General information. ....                                                   | S1  |
| 2. General procedure for the synthesis of starting materials.....              | S2  |
| 3. Experimental procedures .....                                               | S5  |
| 4. Mechanistic studies .....                                                   | S18 |
| 5. References.....                                                             | S19 |
| 6. Spectra of $^1\text{H}$ NMR, $^{13}\text{C}$ NMR, $^{19}\text{F}$ NMR ..... | S20 |

## 1. General information.

All new compounds were fully characterized. All reactions and manipulations involving air-sensitive compounds were performed using standard Schlenk techniques. Anhydrous MeCN was purchased from Annaiji Chemical and was used as received.  $^1\text{H}$  and  $^{13}\text{C}$  NMR spectra were recorded on an Agilent DD2 400 MHz spectrometer. The chemical shifts in  $^1\text{H}$  NMR spectra were recorded relative to  $\text{CDCl}_3$  ( $\delta$  7.26). The chemical shifts in  $^{13}\text{C}$  NMR spectra were recorded relative to  $\text{CDCl}_3$  ( $\delta$  77.0). The high-resolution mass spectral (HRMS) data were obtained on quadrupole-type Bruker Dalton MAXIS (APCI). Gas analyses were conducted with a Shimadzu GC-2014 equipped with ULBON HR-1 glass capillary column (Shinwa Chemical Industries) and an FID detector. Unless otherwise noted, materials obtained from commercial suppliers were used without further purification.

## 2. General procedure for the synthesis of starting materials

### General procedure A

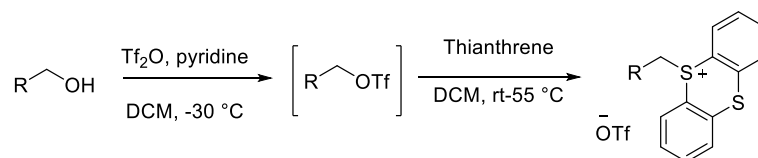

A flame-dried 100 mL flask was placed under an atmosphere of nitrogen and charged with a stir bar and alcohol (5.0 mmol, 1.0 equiv). The alcohol was dissolved in  $\text{CH}_2\text{Cl}_2$  (20.0 mL) and cooled to  $-30\text{ }^\circ\text{C}$  before adding pyridine (483  $\mu\text{L}$ , 6.0 mmol, 1.2 equiv). While stirring, triflic anhydride (1.0 mL, 29.3 mmol, 1.20 equiv) was added dropwise, and then the reaction mixture stirred for 3 h while remaining at  $-5\text{ }^\circ\text{C}$ . While the flask was still in a  $-5\text{ }^\circ\text{C}$  bath, 0.5 M  $\text{H}_2\text{SO}_4$  (30 mL) was added. The flask was removed from the cold bath, and the mixture was transferred to a separatory funnel and extracted with  $3 \times 20\text{ mL}$  of  $\text{CH}_2\text{Cl}_2$ . The organic layers were combined and washed  $1 \times 50\text{ mL}$  of distilled water. The collected organic layers were then dried over  $\text{MgSO}_4$ , then filtered and concentrated to a 10 mL liquid under vacuum (without heating), which was used directly in the next step.

Flame-dried 25 mL Schlenk tube was added thianthrene (1.08 g, 5.0 mmol), then the above liquid was added. The mixture was stirred at 55 °C for 24 h. The mixture was carefully condensed under reduced pressure at 25 °C and purified by precipitation with Et<sub>2</sub>O/DCM. Most of the unreacted dibenzothiophene was removed by repeating the precipitation procedure 2 or 3 times. If the salt still did not precipitate, it was subjected to silica gel chromatography with acetone/DCM.<sup>1</sup>

### Method B:

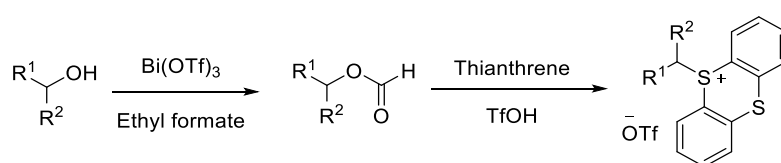

A solution of alcohol (20 mmol) in ethyl formate (60 mL) was treated with 0.4 mmol of Bi(OTf)<sub>3</sub>. The reaction mixture was stirred under reflux conditions for 5 h. Evaporation of the solvent followed by silica-gel chromatography gave the pure formate.

To a stirred mixture of thianthrene (1.08 g, 5.0 mmol) and formate (10.0 mmol), cooled in an ice-bath, was added 2.5 mL of trifluoromethanesulfonic acid. The mixture was removed from the ice-bath and stirred for 10 h at room temperature, after which it was poured into 100 mL of water. The resulting suspension was extracted with DCM. The collected organic layers were then dried over MgSO<sub>4</sub>, then filtered and concentrated under reduced pressure at 25 °C and purified by precipitation with Et<sub>2</sub>O/DCM. Most of the unreacted dibenzothiophene was removed by repeating the precipitation procedure 2 or 3 times.<sup>1</sup>

Alkylthianthrenium salts exhibit greater stability and are more amenable to long-term preservation when compared to alkyl trifluoromethanesulfonate compounds. For instance, when phenethyl trifluoromethanesulfonate is exposed to air at room temperature for 24 hours, its initially colorless and transparent appearance transforms into a deep yellow hue (Scheme S1). Our comparison of the NMR data reveals that compound has undergone decomposition, resulting in the formation of unidentified by-products. By comparison, alkylthianthrenium salt **1a** do not exhibit significant changes

after being placed in the air for 24 hours (Scheme S3).

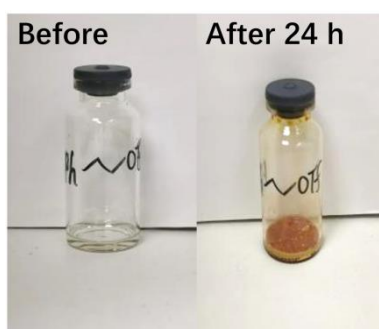

Scheme S1

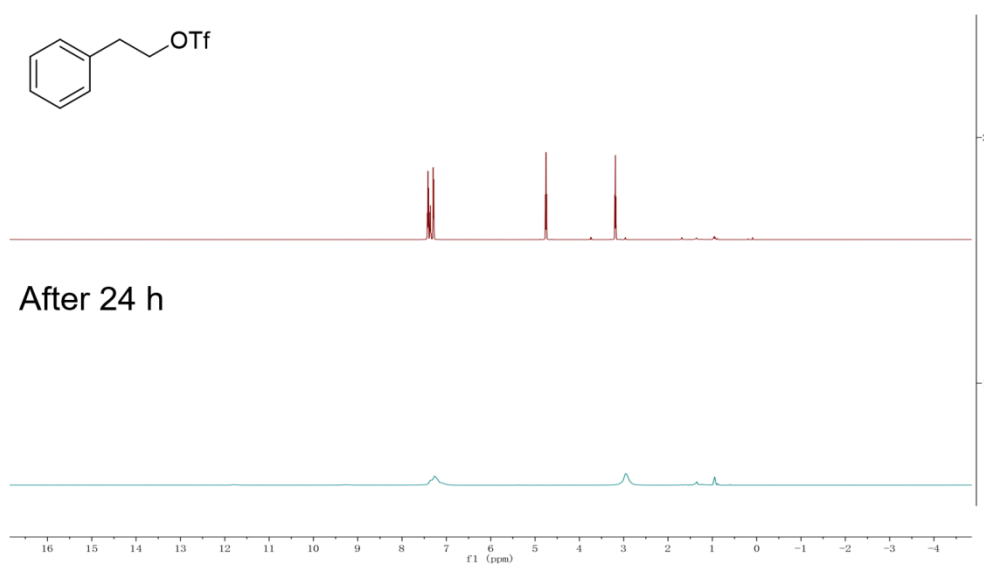

Scheme S2

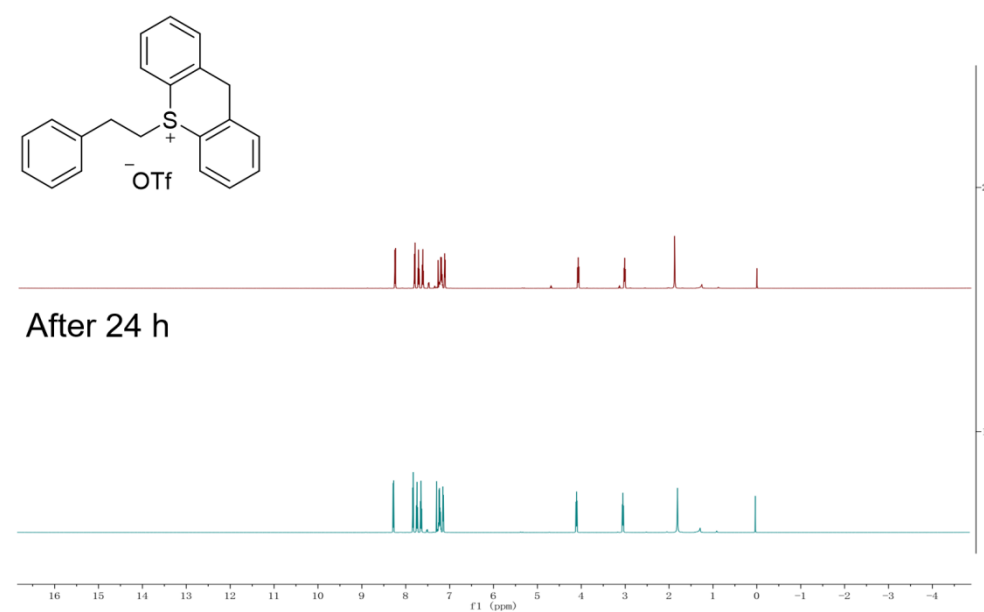

Scheme S3

### 3. Experimental procedures

#### General procedure for the synthesis of thioetherification products:

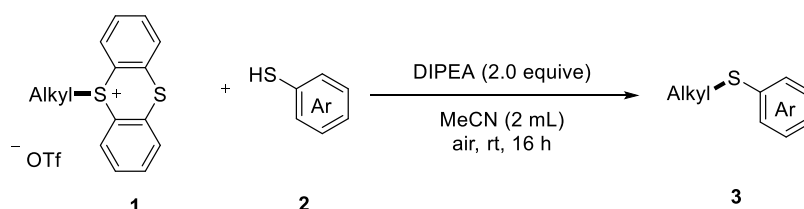

To a 10 mL Schlenk tube was added alkyl sulfonate **1** (0.3 mmol, 1.5 equiv), thiophenol **2** (0.2 mmol, 1.0 equiv), DIPEA (0.4 mmol, 2.0 equiv) and anhydrous acetonitrile (2 mL). The resulting mixture was stirred at room temperature for 16 h. The reaction mixture was quenched with dichloromethane. The organic layer was concentrated and purified by silica gel chromatography (petroleum ether and ethyl acetate) to afford the desired product **3**.

#### Gram-scale reaction:

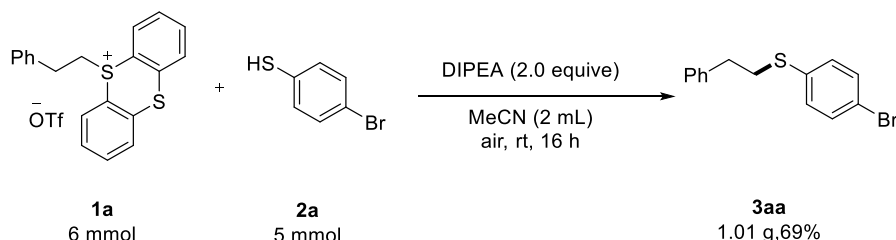

To a 50 mL Schlenk tube was added alkyl sulfonate **1a** (6 mmol, 2.82 g, 1.5 equiv), thiophenol **2a** (5 mmol, 0.96 g, 1.0 equiv), DIPEA (10 mmol, 1.77 mL, 2.0 equiv) and anhydrous acetonitrile (10 mL). The resulting mixture was stirred at room temperature for 16 h. After the reaction was completed, it was quenched with water. The residue was then extracted with CH<sub>2</sub>Cl<sub>2</sub> (3 × 20 mL) and the combined organic layers were dried over anhydrous Na<sub>2</sub>SO<sub>4</sub>. The organic layer was concentrated in vacuo, resulting in a colorless oil. It was then concentrated and purified by silica gel chromatography to afford **3aa** (1.01 g, yield: 69%).

**(4-Bromophenyl)(phenethyl)sulfane (3aa)<sup>2</sup>**

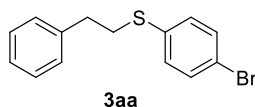

Following the general procedure, the reaction of **1a** (141.3 mg, 0.3 mmol, 1.5 equiv), **2a** (38.3 mg, 0.2 mmol, 1.0 equiv), DIPEA (71  $\mu$ L, 0.4 mmol, 2.0 equiv) and anhydrous acetonitrile (2 mL) at room temperature for 16 h. After column chromatography on silica (eluent: petroleum ether), afford **3aa** (55.4 mg, 88%) as a colorless oil. **<sup>1</sup>H NMR (400 MHz, Chloroform-d)**  $\delta$  7.42 (d,  $J$  = 7.0 Hz, 2H), 7.32 (t,  $J$  = 7.3 Hz, 2H), 7.27 – 7.16 (m, 5H), 3.16 (t,  $J$  = 7.8 Hz, 2H), 2.98 – 2.89 (m, 2H) ppm. **<sup>13</sup>C NMR (101 MHz, Chloroform-d)**  $\delta$  139.9, 135.7, 132.0, 130.7, 128.6, 128.5, 126.7, 119.8, 35.5, 35.2 ppm. **HRMS m/z (ESI):** calcd for C<sub>14</sub>H<sub>14</sub>BrS (M + H)<sup>+</sup> 292.9994, found 292.9996.

**(5-Bromophenyl)(4-fluorophenethyl)sulfane (3ba)**

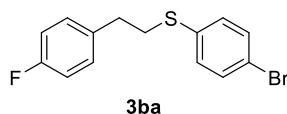

Following the general procedure, the reaction of **1b** (146.7 mg, 0.3 mmol, 1.5 equiv), **2a** (38.3 mg, 0.2 mmol, 1.0 equiv), DIPEA (71  $\mu$ L, 0.4 mmol, 2.0 equiv) and anhydrous acetonitrile (2 mL) at room temperature for 16 h. After column chromatography on silica (eluent: petroleum ether), afford **3ba** (47.9 mg, 77%) as a colorless oil. **<sup>1</sup>H NMR (400 MHz, Chloroform-d)**  $\delta$  7.42 (d,  $J$  = 8.4 Hz, 2H), 7.20 (d,  $J$  = 8.4 Hz, 2H), 7.17 – 7.10 (m, 2H), 6.99 (t,  $J$  = 8.6 Hz, 2H), 3.17 – 3.09 (m, 2H), 2.94 – 2.85 (m, 2H) ppm. **<sup>13</sup>C NMR (101 MHz, Chloroform-d)**  $\delta$  161.6 (d,  $J$  = 244.6 Hz), 135.5 (d,  $J$  = 3.2 Hz), 135.4, 132.0, 130.8, 129.9 (d,  $J$  = 7.9 Hz), 119.9, 115.3 (d,  $J$  = 21.2 Hz), 35.3, 34.6 ppm. **<sup>19</sup>F NMR (376 MHz, Chloroform-d)**  $\delta$  -116.42 ppm. **EI-MS (m/z, relative intensity):** 311.21 (M<sup>+</sup>, 55), 309.94 (55), 202.94 (64), 200.93 (72), 123.07 (86), 122.03 (100), 109.02 (50), 103.01 (42).

### (4-Bromophenyl)(4-chlorophenethyl)sulfane (**3ca**)<sup>2</sup>

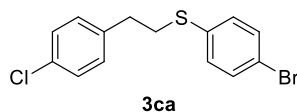

Following the general procedure, the reaction of **1c** (151.5 mg, 0.3 mmol, 1.5 equiv), **2a** (38.3 mg, 0.2 mmol, 1.0 equiv), DIPEA (71  $\mu$ L, 0.4 mmol, 2.0 equiv) and anhydrous acetonitrile (2 mL) at room temperature for 16 h. After column chromatography on silica (eluent: petroleum ether), afford **3ca** (57.8 mg, 88%) as a colorless oil. <sup>1</sup>H NMR (400 MHz, Chloroform-d)  $\delta$  7.41 (d,  $J$  = 8.4 Hz, 2H), 7.26 (d,  $J$  = 8.3 Hz, 2H), 7.19 (d,  $J$  = 8.4 Hz, 2H), 7.10 (d,  $J$  = 8.3 Hz, 2H), 3.16 – 3.08 (m, 2H), 2.92 – 2.83 (m, 2H) ppm. <sup>13</sup>C NMR (101 MHz, Chloroform-d)  $\delta$  138.2, 135.3, 132.4, 132.0, 130.9, 129.9, 128.7, 120.0, 35.1, 34.8 ppm. HRMS  $m/z$  (ESI): calcd for C<sub>14</sub>H<sub>12</sub>BrClNaS (M + Na)<sup>+</sup> 348.9424, found 348.9428.

### (4-Bromophenethyl)(4-bromophenyl)sulfane (**3da**)<sup>3</sup>

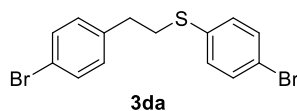

Following the general procedure, the reaction of **1d** (164.7 mg, 0.3 mmol, 1.5 equiv), **2a** (38.3 mg, 0.2 mmol, 1.0 equiv), DIPEA (71  $\mu$ L, 0.4 mmol, 2.0 equiv) and anhydrous acetonitrile (2 mL) at room temperature for 16 h. After column chromatography on silica (eluent: petroleum ether), afford **3da** (56.3 mg, 76%) as a colorless oil. <sup>1</sup>H NMR (400 MHz, Chloroform-d)  $\delta$  7.42 (dd,  $J$  = 8.5, 2.1 Hz, 4H), 7.20 (d,  $J$  = 8.5 Hz, 2H), 7.05 (d,  $J$  = 8.3 Hz, 2H), 3.16 – 3.08 (m, 2H), 2.90 – 2.83 (m, 2H) ppm. <sup>13</sup>C NMR (101 MHz, Chloroform-d)  $\delta$  138.8, 135.3, 132.0, 131.6, 130.9, 130.3, 120.4, 120.0, 35.0, 34.8 ppm. HRMS  $m/z$  (APCI): calcd for C<sub>14</sub>H<sub>12</sub>Br<sub>2</sub>S (M)<sup>+</sup> 369.9026, found 369.9024.



### (5-Bromophenyl)(4-iodophenethyl)sulfane (3ea)

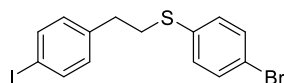

3ea

Following the general procedure, the reaction of **1e** (178.9 mg, 0.3 mmol, 1.5 equiv.), **2a** (38.3 mg, 0.2 mmol, 1.0 equiv), DIPEA (71  $\mu$ L, 0.4 mmol, 2.0 equiv) and anhydrous acetonitrile (2 mL) at room temperature for 16 h. After column chromatography on silica (eluent: petroleum ether), afford **3ea** (74.5 mg, 89%) as a colorless oil. **<sup>1</sup>H NMR (400 MHz, Chloroform-d)**  $\delta$  7.62 (d,  $J$  = 8.2 Hz, 2H), 7.41 (d,  $J$  = 8.4 Hz, 2H), 7.19 (d,  $J$  = 8.5 Hz, 2H), 6.93 (d,  $J$  = 8.1 Hz, 2H), 3.16 – 3.08 (m, 2H), 2.90 – 2.81 (m, 2H) ppm. **<sup>13</sup>C NMR (101 MHz, Chloroform-d)**  $\delta$  139.4, 137.6, 135.3, 132.0, 130.9, 130.6, 120.0, 91.8, 35.0, 34.9 ppm. **HRMS  $m/z$  (ESI):** calcd for C<sub>14</sub>H<sub>12</sub>BrINaS (M + Na)<sup>+</sup> 440.8780, found 440.8718.

### 4-(2-((4-Bromophenyl)thio)ethyl)benzonitrile (3fa)

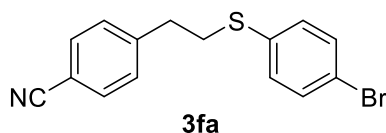

3fa

Following the general procedure, the reaction of **1f** (148.8 mg, 0.3 mmol, 1.5 equiv.), **2a** (38.3 mg, 0.2 mmol, 1.0 equiv), DIPEA (71  $\mu$ L, 0.4 mmol, 2.0 equiv) and anhydrous acetonitrile (2 mL) at room temperature for 16 h. After column chromatography on silica (eluent: petroleum ether), afford **3fa** (40.4 mg, 64%) as a colorless oil. **<sup>1</sup>H NMR (400 MHz, Chloroform-d)**  $\delta$  7.58 (d,  $J$  = 8.2 Hz, 2H), 7.41 (d,  $J$  = 8.5 Hz, 2H), 7.27 (d,  $J$  = 8.1 Hz, 2H), 7.19 (d,  $J$  = 8.5 Hz, 2H), 3.14 (t,  $J$  = 7.5 Hz, 2H), 2.95 (t,  $J$  = 7.5 Hz, 2H) ppm. **<sup>13</sup>C NMR (101 MHz, Chloroform-d)**  $\delta$  145.2, 134.8, 132.3, 132.1, 131.1, 129.4, 120.3, 118.8, 110.5, 35.4, 34.7 ppm. **HRMS  $m/z$  (ESI):** calcd for C<sub>15</sub>H<sub>12</sub>BrNNS (M + Na)<sup>+</sup> 339.9766, found 339.9756.

### (7-Bromopentyl)(4-bromophenyl)sulfane (**3ga**)

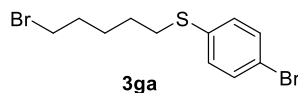

Following the general procedure, the reaction of **1g** (158.7 mg, 0.3 mmol, 1.5 equiv), **2a** (38.3 mg, 0.2 mmol, 1.0 equiv), DIPEA (71  $\mu$ L, 0.4 mmol, 2.0 equiv) and anhydrous acetonitrile (2 mL) at room temperature for 16 h. After column chromatography on silica (eluent: petroleum ether), afford **3ga** (49.5 mg, 73%) as a colorless oil. **<sup>1</sup>H NMR (400 MHz, Chloroform-d)**  $\delta$  7.39 (d,  $J$  = 8.6 Hz, 2H), 7.18 (d,  $J$  = 8.6 Hz, 2H), 3.39 (t,  $J$  = 6.7 Hz, 2H), 2.90 (t,  $J$  = 7.1 Hz, 2H), 1.86 (p,  $J$  = 6.8 Hz, 2H), 1.71 – 1.51 (m, 4H) ppm. **<sup>13</sup>C NMR (101 MHz, Chloroform-d)**  $\delta$  135.8, 131.9, 130.6, 119.6, 33.49, 33.46, 32.2, 28.1, 27.3 ppm. **HRMS m/z (APCI):** calcd for C<sub>11</sub>H<sub>15</sub>Br<sub>2</sub>S (M + H)<sup>+</sup> 336.9256, found 339.9245.

### 1,6-Bis((4-bromophenyl)thio)hexane (**3ha**)

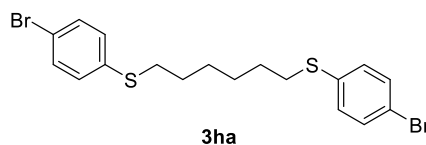

Following the general procedure, the reaction of **1h** (179.6 mg, 0.3 mmol, 1.5 equiv), **2a** (76.6 mg, 0.4 mmol, 2.0 equiv), DIPEA (71  $\mu$ L, 0.4 mmol, 2.0 equiv) and anhydrous acetonitrile (2 mL) at room temperature for 16 h. After column chromatography on silica (eluent: petroleum ether), afford **3ha** (124.9 mg, 89%) as a white solid. **<sup>1</sup>H NMR (400 MHz, Chloroform-d)**  $\delta$  7.38 (d,  $J$  = 8.5 Hz, 4H), 7.16 (d,  $J$  = 8.5 Hz, 4H), 2.87 (t,  $J$  = 7.3 Hz, 4H), 1.68 – 1.59 (m, 4H), 1.42 (p,  $J$  = 3.7 Hz, 4H) ppm. **<sup>13</sup>C NMR (101 MHz, Chloroform-d)**  $\delta$  136.0, 131.9, 130.4, 119.5, 33.5, 28.8, 28.2 ppm. **m.p.:** 73.6–78.8 °C. **HRMS m/z (ESI):** calcd for C<sub>18</sub>H<sub>21</sub>Br<sub>2</sub>S<sub>2</sub> (M + H)<sup>+</sup> 458.9446, found 458.9445.

### Diphenethylsulfane (**3ab**)<sup>4</sup>

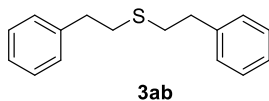

Following the general procedure, the reaction of **1a** (141.3 mg, 0.3 mmol, 1.5 equiv), **2b** (27  $\mu$ L, 0.2 mmol, 1.0 equiv), DIPEA (71  $\mu$ L, 0.4 mmol, 2.0 equiv) and anhydrous acetonitrile (2 mL) at room temperature for 16 h. After column chromatography on silica (eluent: petroleum ether), afford **3ab** (46.3 mg, 95%) as a colorless oil. **<sup>1</sup>H NMR (400 MHz, Chloroform-d)**  $\delta$  7.38 – 7.29 (m, 4H), 7.29 – 7.18 (m, 6H), 2.96 – 2.87 (m, 4H), 2.87 – 2.77 (m, 4H) ppm. **<sup>13</sup>C NMR (101 MHz, Chloroform-d)**  $\delta$  140.6, 128.5, 126.4, 36.4, 33.8 ppm. **HRMS m/z (ESI):** calcd for C<sub>16</sub>H<sub>18</sub>NaS (M + Na)<sup>+</sup> 265.1021, found 265.1003.

### Phenethyl(*p*-tolyl)sulfane (**3ac**)<sup>5</sup>

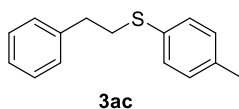

Following the general procedure, the reaction of **1a** (141.3 mg, 0.3 mmol, 1.5 equiv), **2c** (25  $\mu$ L, 0.2 mmol, 1.0 equiv), DIPEA (71  $\mu$ L, 0.4 mmol, 2.0 equiv) and anhydrous acetonitrile (2 mL) at room temperature for 16 h. After column chromatography on silica (eluent: petroleum ether), afford **3ea** (28.0 mg, 61%) as a colorless oil. **<sup>1</sup>H NMR (400 MHz, Chloroform-d)**  $\delta$  7.35 – 7.26 (m, 4H), 7.25 – 7.17 (m, 3H), 7.13 (d,  $J$  = 7.9 Hz, 2H), 3.18 – 3.10 (m, 2H), 2.96 – 2.87 (m, 2H), 2.34 (s, 3H) ppm. **<sup>13</sup>C NMR (101 MHz, Chloroform-d)**  $\delta$  140.3, 136.2, 132.5, 130.1, 129.7, 128.5, 126.4, 35.84, 35.77, 21.0 ppm. **HRMS m/z (ESI):** calcd for C<sub>15</sub>H<sub>16</sub>Na S (M + Na)<sup>+</sup> 251.0865, found 251.0857.

### (4-(*tert*-Butyl)phenyl)(phenethyl)sulfane (**3ad**)

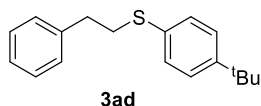

Following the general procedure, the reaction of **1a** (141.3 mg, 0.3 mmol, 1.5 equiv), **2d** (38.3 mg, 0.2 mmol, 1.0 equiv), DIPEA (71  $\mu$ L, 0.4 mmol, 2.0 equiv) and anhydrous acetonitrile (2 mL) at room temperature for 16 h. After column chromatography on silica (eluent: petroleum ether), afford **3ad** (51.4 mg, 95%) as a colorless oil. **<sup>1</sup>H NMR (400 MHz, Chloroform-d)**  $\delta$  7.40 – 7.31 (m, 6H), 7.26 (t,  $J$  = 8.7 Hz, 3H), 3.23 – 3.16 (m, 2H), 3.02 – 2.93 (m, 2H), 1.36 (s, 9H) ppm. **<sup>13</sup>C NMR (101 MHz, Chloroform-d)**  $\delta$  149.3, 140.4, 132.7, 129.5, 128.5, 126.4, 126.0, 35.9, 35.5, 34.5, 31.3 ppm. **HRMS m/z (ESI):** calcd for C<sub>18</sub>H<sub>22</sub>NaS (M + Na)<sup>+</sup> 293.1334, found 293.1331.

#### (4-Methoxyphenyl)(phenethyl)sulfane (**3ae**)<sup>6</sup>

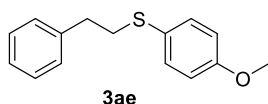

Following the general procedure, the reaction of **1a** (141.3 mg, 0.3 mmol, 1.5 equiv), **2e** (25  $\mu$ L, 0.2 mmol, 1.0 equiv), DIPEA (71  $\mu$ L, 0.4 mmol, 2.0 equiv) and anhydrous acetonitrile (2 mL) at room temperature for 16 h. After column chromatography on silica (eluent: petroleum ether/ethyl acetate 100:1), afford **3ae** (39.2 mg, 80%) as a colorless oil. **<sup>1</sup>H NMR (400 MHz, Chloroform-d)**  $\delta$  7.39 (d,  $J$  = 7.9 Hz, 2H), 7.31 (t,  $J$  = 7.6 Hz, 2H), 7.23 (d,  $J$  = 6.9 Hz, 1H), 7.19 (d,  $J$  = 7.6 Hz, 2H), 6.88 (d,  $J$  = 8.8 Hz, 2H), 3.82 (s, 3H), 3.13 – 3.05 (m, 2H), 2.93 – 2.84 (m, 2H) ppm. **<sup>13</sup>C NMR (101 MHz, Chloroform-d)**  $\delta$  158.9, 140.4, 133.3, 128.5, 128.4, 126.4, 114.6, 55.4, 37.3, 35.9 ppm. **HRMS m/z (ESI):** calcd for C<sub>15</sub>H<sub>16</sub>NaOS (M + Na)<sup>+</sup> 267.0814, found 267.0794.

#### (4-Chlorophenyl)(phenethyl)sulfane (**3af**)<sup>5</sup>

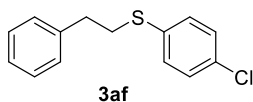

Following the general procedure, the reaction of **1a** (141.3 mg, 0.3 mmol, 1.5 equiv), **2f** (28.9 mg, 0.2 mmol, 1.0 equiv), DIPEA (71  $\mu$ L, 0.4 mmol, 2.0 equiv) and anhydrous acetonitrile (2 mL) at room temperature for 16 h. After column chromatography on silica (eluent: petroleum ether), afford **3af** (36.6 mg, 74%) as a colorless oil. **<sup>1</sup>H NMR**

(400 MHz, Chloroform-d)  $\delta$  7.35 – 7.22 (m, 7H), 7.20 (d,  $J$  = 6.9 Hz, 2H), 3.20 – 3.12 (m, 2H), 2.97 – 2.87 (m, 2H) ppm.  $^{13}\text{C}$  NMR (101 MHz, Chloroform-d)  $\delta$  139.9, 134.9, 132.0, 130.6, 129.1, 128.6, 128.5, 126.6, 35.5, 35.4 ppm. HRMS  $m/z$  (ESI): calcd for  $\text{C}_{14}\text{H}_{13}\text{ClNaS}$  ( $\text{M} + \text{Na}$ ) $^+$  271.0319, found 271.0297.

### Phenethyl(4-(trifluoromethyl)phenyl)sulfane (3ag)

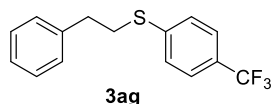

Following the general procedure, the reaction of **1a** (141.3 mg, 0.3 mmol, 1.5 equiv), **2g** (28  $\mu\text{L}$ , 0.2 mmol, 1.0 equiv), DIPEA (71  $\mu\text{L}$ , 0.4 mmol, 2.0 equiv) and anhydrous acetonitrile (2 mL) at room temperature for 16 h. After column chromatography on silica (eluent: petroleum ether), afford **3ag** (36.0 mg, 64%) as a colorless oil.  $^1\text{H}$  NMR (400 MHz, Chloroform-d)  $\delta$  7.53 (d,  $J$  = 8.2 Hz, 2H), 7.41 – 7.29 (m, 4H), 7.24 (dd,  $J$  = 15.8, 6.9 Hz, 3H), 3.28 – 3.19 (m, 2H), 3.02 – 2.93 (m, 2H) ppm.  $^{13}\text{C}$  NMR (101 MHz, Chloroform-d)  $\delta$  142.1, 139.7, 128.6 (d,  $J$  = 13.1 Hz), 127.4, 126.7, 125.7 (q,  $J$  = 3.7 Hz), 124.2 (q,  $J$  = 271.6 Hz), 35.2, 33.9 ppm.  $^{19}\text{F}$  NMR (471 MHz, Chloroform-d)  $\delta$  -62.4 ppm. HRMS  $m/z$  (ESI): calcd for  $\text{C}_{15}\text{H}_{14}\text{F}_3\text{S}$  ( $\text{M} + \text{H}$ ) $^+$  283.0763, found 283.0755.

### (3-Bromophenyl)(phenethyl)sulfane (3ah)

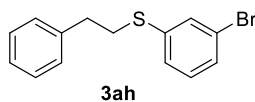

Following the general procedure, the reaction of **1a** (141.3 mg, 0.3 mmol, 1.5 equiv), **2h** (21  $\mu\text{L}$ , 0.2 mmol, 1.0 equiv), DIPEA (71  $\mu\text{L}$ , 0.4 mmol, 2.0 equiv) and anhydrous acetonitrile (2 mL) at room temperature for 16 h. After column chromatography on silica (eluent: petroleum ether), afford **3ah** (47.4 mg, 81%) as a colorless oil.  $^1\text{H}$  NMR (400 MHz, Chloroform-d)  $\delta$  7.47 (s, 1H), 7.33 (t,  $J$  = 7.3 Hz, 3H), 7.24 (dd,  $J$  = 16.7, 7.5 Hz, 4H), 7.15 (t,  $J$  = 7.9 Hz, 1H), 3.22 – 3.15 (m, 2H), 2.99 – 2.91 (m, 2H) ppm.

$^{13}\text{C}$  NMR (101 MHz, Chloroform-d)  $\delta$  139.8, 139.0, 131.1, 130.2, 128.8, 128.6, 128.5, 127.2, 126.6, 122.9, 35.4, 34.8 ppm. HRMS  $m/z$  (ESI): calcd for  $\text{C}_{14}\text{H}_{13}\text{BrNaS}$  ( $\text{M} + \text{Na}$ ) $^{+}$  314.9814, found 314.9803.

### (3-Chlorophenyl)(phenethyl)sulfane (3ai)

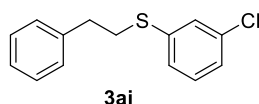

Following the general procedure, the reaction of **1a** (141.3 mg, 0.3 mmol, 1.5 equiv), **2i** (23  $\mu\text{L}$ , 0.2 mmol, 1.0 equiv), DIPEA (71  $\mu\text{L}$ , 0.4 mmol, 2.0 equiv) and anhydrous acetonitrile (2 mL) at room temperature for 16 h. After column chromatography on silica (eluent: petroleum ether), afford **3ai** (40.8 mg, 82%) as a colorless oil.  $^1\text{H}$  NMR (400 MHz, Chloroform-d)  $\delta$  7.38 (d,  $J = 7.1$  Hz, 1H), 7.36 – 7.19 (m, 7H), 7.12 (t,  $J = 7.1$  Hz, 1H), 3.26 – 3.14 (m, 2H), 3.03 – 2.93 (m, 2H) ppm.  $^{13}\text{C}$  NMR (101 MHz, Chloroform-d)  $\delta$  140.0, 135.8, 133.6, 129.7, 128.6, 128.5, 128.4, 127.1, 126.6, 126.5, 35.2, 33.9 ppm. HRMS  $m/z$  (ESI): calcd for  $\text{C}_{14}\text{H}_{13}\text{ClNaS}$  ( $\text{M} + \text{Na}$ ) $^{+}$  271.0319, found 271.0297.

### (2-Fluorophenyl)(phenethyl)sulfane (3aj)

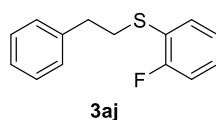

Following the general procedure, the reaction of **1a** (141.3 mg, 0.3 mmol, 1.5 equiv), **2j** (22  $\mu\text{L}$ , 0.2 mmol, 1.0 equiv), DIPEA (71  $\mu\text{L}$ , 0.4 mmol, 2.0 equiv) and anhydrous acetonitrile (2 mL) at room temperature for 16 h. After column chromatography on silica (eluent: petroleum ether), afford **3aj** (40.5 mg, 87%) as a colorless oil.  $^1\text{H}$  NMR (400 MHz, Chloroform-d)  $\delta$  7.44 – 7.37 (m, 1H), 7.31 (t,  $J = 7.2$  Hz, 2H), 7.27 – 7.17 (m, 4H), 7.14 – 7.04 (m, 2H), 3.22 – 3.12 (m, 2H), 2.98 – 2.87 (m, 2H) ppm.  $^{13}\text{C}$  NMR (101 MHz, Chloroform-d)  $\delta$  161.5 (d,  $J = 245.4$  Hz), 140.0, 132.2 (d,  $J = 15.1$  Hz), 128.6, 128.5, 126.5, 124.4, 123.0 (d,  $J = 17.8$  Hz), 115.7 (d,  $J = 22.0$  Hz), 35.8, 34.8 ppm.  $^{19}\text{F}$  NMR (376 MHz, Chloroform-d)  $\delta$  -109.3 ppm. HRMS  $m/z$  (ESI): calcd for

$C_{14}H_{13}FNaS$  ( $M + Na$ )<sup>+</sup> 255.0614, found 255.0610.

### (2,6-Dimethylphenyl)(phenethyl)sulfane (**3ak**)

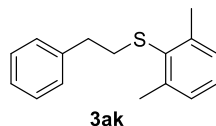

Following the general procedure, the reaction of **1a** (141.3 mg, 0.3 mmol, 1.5 equiv), **2k** (27  $\mu$ L, 0.2 mmol, 1.0 equiv), DIPEA (71  $\mu$ L, 0.4 mmol, 2.0 equiv) and anhydrous acetonitrile (2 mL) at room temperature for 16 h. After column chromatography on silica (eluent: petroleum ether), afford **3ak** (31.8 mg, 54%) as a colorless oil. **<sup>1</sup>H NMR (400 MHz, Chloroform-d)**  $\delta$  7.29 (d,  $J$  = 7.0 Hz, 2H), 7.24 – 7.06 (m, 6H), 2.98 – 2.88 (m, 2H), 2.88 – 2.79 (m, 2H), 2.54 (s, 6H) ppm. **<sup>13</sup>C NMR (101 MHz, Chloroform-d)**  $\delta$  143.1, 140.5, 133.4, 128.4, 128.4, 128.2, 128.1, 126.3, 36.5, 36.4, 22.1 ppm. **HRMS m/z (ESI):** calcd for  $C_{16}H_{18}NaS$  ( $M + Na$ )<sup>+</sup> 265.1021, found 265.1008.

### 2-(Phenethylthio)pyridine(**3al**)<sup>7</sup>

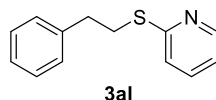

Following the general procedure, the reaction of **1a** (141.3 mg, 0.3 mmol, 1.5 equiv), **2l** (23  $\mu$ L, 0.2 mmol, 1.0 equiv), DIPEA (71  $\mu$ L, 0.4 mmol, 2.0 equiv) and anhydrous acetonitrile (2 mL) at room temperature for 16 h. After column chromatography on silica (eluent: petroleum ether), afford **3al** (37.8 mg, 90%) as a colorless oil. **<sup>1</sup>H NMR (400 MHz, Chloroform-d)**  $\delta$  8.50 – 8.42 (m, 1H), 7.51 – 7.43 (m, 1H), 7.35 – 7.20 (m, 5H), 7.17 (d,  $J$  = 8.1 Hz, 1H), 6.98 (dd,  $J$  = 7.3, 4.9 Hz, 1H), 3.48 – 3.40 (m, 2H), 3.07 – 2.99 (m, 2H) ppm. **<sup>13</sup>C NMR (101 MHz, Chloroform-d)**  $\delta$  158.9, 149.4, 140.5, 135.9, 128.6, 128.4, 126.4, 122.4, 119.3, 35.8, 31.5 ppm. **HRMS m/z (ESI):** calcd for  $C_{13}H_{13}NNaS$  ( $M + Na$ )<sup>+</sup> 238.0661, found 238.0644.

### 2-(Phenethylthio)thiophene (**3am**)

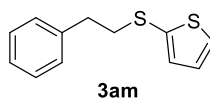

Following the general procedure, the reaction of **1a** (141.3 mg, 0.3 mmol, 1.5 equiv), **2m** (19  $\mu$ L, 0.2 mmol, 1.0 equiv), DIPEA (71  $\mu$ L, 0.4 mmol, 2.0 equiv) and anhydrous acetonitrile (2 mL) at room temperature for 16 h. After column chromatography on silica (eluent: petroleum ether), afford **3am** (31.5 mg, 71%) as a colorless oil. **<sup>1</sup>H NMR (400 MHz, Chloroform-d)**  $\delta$  7.37 (d,  $J$  = 4.6 Hz, 1H), 7.30 (t,  $J$  = 7.3 Hz, 2H), 7.26 – 7.12 (m, 4H), 7.00 (dd,  $J$  = 5.3, 3.5 Hz, 1H), 3.09 – 3.01 (m, 2H), 2.96 – 2.88 (m, 2H) ppm. **<sup>13</sup>C NMR (101 MHz, Chloroform-d)**  $\delta$  140.0, 134.4, 133.6, 129.2, 128.6, 128.5, 127.6, 126.4, 40.1, 36.0 ppm. **HRMS m/z (ESI):** calcd for C<sub>12</sub>H<sub>12</sub>NaS<sub>2</sub> (M + Na)<sup>+</sup> 243.0273, found 243.0258.

### 2-(Phenethylthio)benzo[d]oxazole (**3an**)

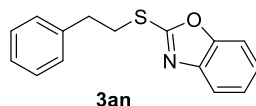

Following the general procedure, the reaction of **1a** (141.3 mg, 0.3 mmol, 1.5 equiv), **2n** (30.2 mg, 0.2 mmol, 1.0 equiv), DIPEA (71  $\mu$ L, 0.4 mmol, 2.0 equiv) and anhydrous acetonitrile (2 mL) at room temperature for 16 h. After column chromatography on silica (eluent: petroleum ether), afford **3an** (44.6 mg, 87%) as a colorless oil. **<sup>1</sup>H NMR (400 MHz, Chloroform-d)**  $\delta$  7.63 (d,  $J$  = 7.0 Hz, 1H), 7.44 (d,  $J$  = 7.6 Hz, 1H), 7.37 – 7.21 (m, 7H), 3.61 – 3.51 (m, 2H), 3.21 – 3.11 (m, 2H) ppm. **<sup>13</sup>C NMR (101 MHz, Chloroform-d)**  $\delta$  164.8, 151.8, 142.0, 139.4, 128.7, 128.6, 126.8, 124.3, 123.8, 118.5, 109.9, 35.6, 33.5 ppm. **HRMS m/z (ESI):** calcd for C<sub>15</sub>H<sub>13</sub>NNaOS (M + Na)<sup>+</sup> 278.0610, found 278.0640.



### 2-(Phenethylthio)-1*H*-benzo[*d*]imidazole (**3ao**)

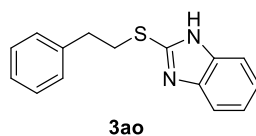

Following the general procedure, the reaction of **1a** (141.3 mg, 0.3 mmol, 1.5 equiv), **2o** (30.0 mg, 0.2 mmol, 1.0 equiv), DIPEA (71  $\mu$ L, 0.4 mmol, 2.0 equiv) and anhydrous acetonitrile (2 mL) at room temperature for 16 h. After column chromatography on silica (eluent: petroleum ether), afford **3ao** (36.0 mg, 71%) as a white solid.  $^1\text{H NMR}$  (400 MHz, Chloroform-*d*)  $\delta$  7.52 (s, 2H), 7.30 – 7.14 (m, 7H), 3.55 (t,  $J = 7.4$  Hz, 2H), 3.05 (t,  $J = 7.4$  Hz, 2H) ppm.  $^{13}\text{C NMR}$  (101 MHz, Chloroform-*d*)  $\delta$  150.11, 139.60, 128.74, 128.52, 126.61, 122.33, 35.84, 34.09 ppm. **m.p.**: 145.0-151.7  $^{\circ}\text{C}$ . **HRMS m/z (ESI)**: calcd for  $\text{C}_{15}\text{H}_{14}\text{N}_2\text{NaS}$  ( $\text{M} + \text{Na}$ ) $^+$  277.0770, found 277.0750.

### General procedure for the synthesis of amination products:

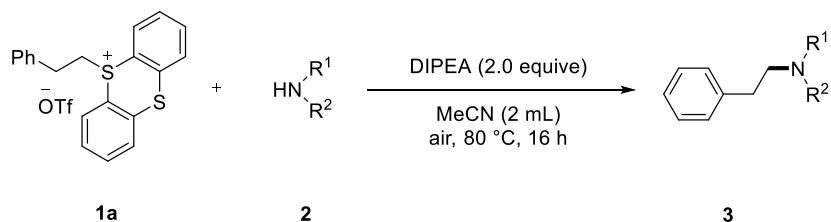

To a 10 mL Schlenk tube was added alkyl sulfonate **1a** (0.3 mmol, 1.5 equiv), amines **2** (0.2 mmol, 1.0 equiv), DIPEA (0.4 mmol, 2.0 equiv) and anhydrous acetonitrile (2 mL). The resulting mixture was stirred at 80  $^{\circ}\text{C}$  for 16 h. The reaction mixture was quenched with dichloromethane. The organic layer was concentrated and purified by silica gel chromatography (petroleum ether and ethyl acetate) to afford the desired product **3**.

### *N*-Phenethylaniline (**3ap**)

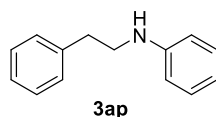

Following the general procedure, the reaction of **1a** (141.3 mg, 0.3 mmol, 1.5 equiv),

**2p** (18  $\mu$ L, 0.2 mmol, 1.0 equiv), DIPEA (71  $\mu$ L, 0.4 mmol, 2.0 equiv) and anhydrous acetonitrile (2 mL) at 80 °C for 16 h. After column chromatography on silica (eluent: petroleum ether), afford **3ap** (20.7 mg, 53%) as a Pale yellow. **<sup>1</sup>H NMR (400 MHz, Chloroform-d)**  $\delta$  7.39 – 7.04 (m, 7H), 6.79 – 6.48 (m, 3H), 3.68 (s, 1H), 3.40 (t,  $J$  = 6.7 Hz, 2H), 2.92 (t,  $J$  = 6.6 Hz, 2H) ppm. **<sup>13</sup>C NMR (101 MHz, Chloroform-d)**  $\delta$  148.0, 139.3, 129.3, 128.8, 128.6, 126.4, 117.5, 113.0, 45.0, 35.5 ppm. **HRMS m/z (ESI):** calcd for C<sub>14</sub>H<sub>15</sub>NNa (M + Na)<sup>+</sup> 220.1097, found 220.1099.

#### *N*-Methyl-*N*-phenethylamine (**3aq**)<sup>8</sup>

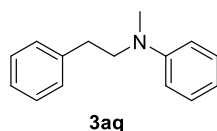

Following the general procedure, the reaction of **1a** (141.3 mg, 0.3 mmol, 1.5 equiv), **2q** (22  $\mu$ L, 0.2 mmol, 1.0 equiv), DIPEA (71  $\mu$ L, 0.4 mmol, 2.0 equiv) and anhydrous acetonitrile (2 mL) at 80 °C for 16 h. After column chromatography on silica (eluent: petroleum ether), afford **3aq** (30.0 mg, 71%) as a colorless liquid. **<sup>1</sup>H NMR (400 MHz, Chloroform-d)**  $\delta$  7.38 – 7.14 (m, 7H), 6.80 – 6.67 (m, 3H), 3.65 – 3.51 (m, 2H), 2.95 – 2.83 (m, 5H) ppm. **<sup>13</sup>C NMR (101 MHz, Chloroform-d)**  $\delta$  148.8, 139.8, 129.3, 128.8, 128.5, 126.2, 116.2, 112.2, 54.8, 38.5, 32.9 ppm. **HRMS m/z (ESI):** calcd for C<sub>15</sub>H<sub>17</sub>NNa (M + Na)<sup>+</sup> 234.1253, found 234.1261.

#### *N*-Methyl-*N*-(naphthalen-1-ylmethyl)-2-phenylethan-1-amine (**3ar**)

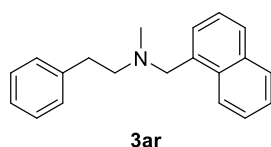

Following the general procedure, the reaction of **1a** (141.3 mg, 0.3 mmol, 1.5 equiv.), **2r** (33  $\mu$ L, 0.2 mmol, 1.0 equiv), DIPEA (71  $\mu$ L, 0.4 mmol, 2.0 equiv) and anhydrous acetonitrile (2 mL) at 80 °C for 16 h. After column chromatography on silica (eluent:



thiophenol **2a** (0.2 mmol, 38.32 g, 1.0 equiv), DIPEA (0.4 mmol, 71  $\mu$ L, 2.0 equiv), BHT (0.4 mmol, 62.5 mg, 2 equiv) and anhydrous acetonitrile (2 mL). The resulting mixture was stirred at room temperature for 16 h. After the reaction was completed, it was quenched with water. The residue was then extracted with  $\text{CH}_2\text{Cl}_2$  ( $3 \times 20$  mL) and the combined organic layers were dried over anhydrous  $\text{Na}_2\text{SO}_4$ . The organic layer was concentrated in vacuo, resulting in a colorless oil. It was then concentrated and purified by silica gel chromatography to afford **3aa** (yield: 83%).

## 5. References

1. C. Chen, M. Wang, H. Lu, B. Zhao, Z. Shi, *Angew. Chem. Int. Ed.* **2021**, *60*, 21756–21760.
2. D. V. Jawale, J.-A. Tchuiteng-Kouatchou, F. Fossard, F. Miserque, V. Geertsen, E. Gravel and E. Doris, *Green Chem.*, **2022**, *24*, 1231.
3. Y. Cai, F. Nie, Q. Song, *J. Org. Chem.* **2021**, *86*, 12419–12426.
4. Shinkar, E. V.; Shvetsova, A. V.; Okhlobystin, A. O.; Berberova, N. T. *Russ J Electrochem.* **2020**, *56*, 285–292.
5. Guo, Z.; Liu, X.; Bai, R.; Che, Y.; Chi, Y.; Guo, C.; Xing, H. *Inorg. Chem.* **2021**, *60*, 8672–8681.
6. F. Zhang, Y. Wang, Y. Wang, Y. Pan, *Org. Lett.* **2021**, *23*, 7524–7528.
7. Z. Qiao, J. Wei, X. Jiang, *Org. Lett.* **2014**, *16*, 1212–1215.
8. Y. Wei, Q. Xuan, Y. Zhou, Q. Song, *Org. Chem. Front.* **2018**, *5*, 3510.

## 6. Spectra of $^1\text{H}$ NMR, $^{13}\text{C}$ NMR

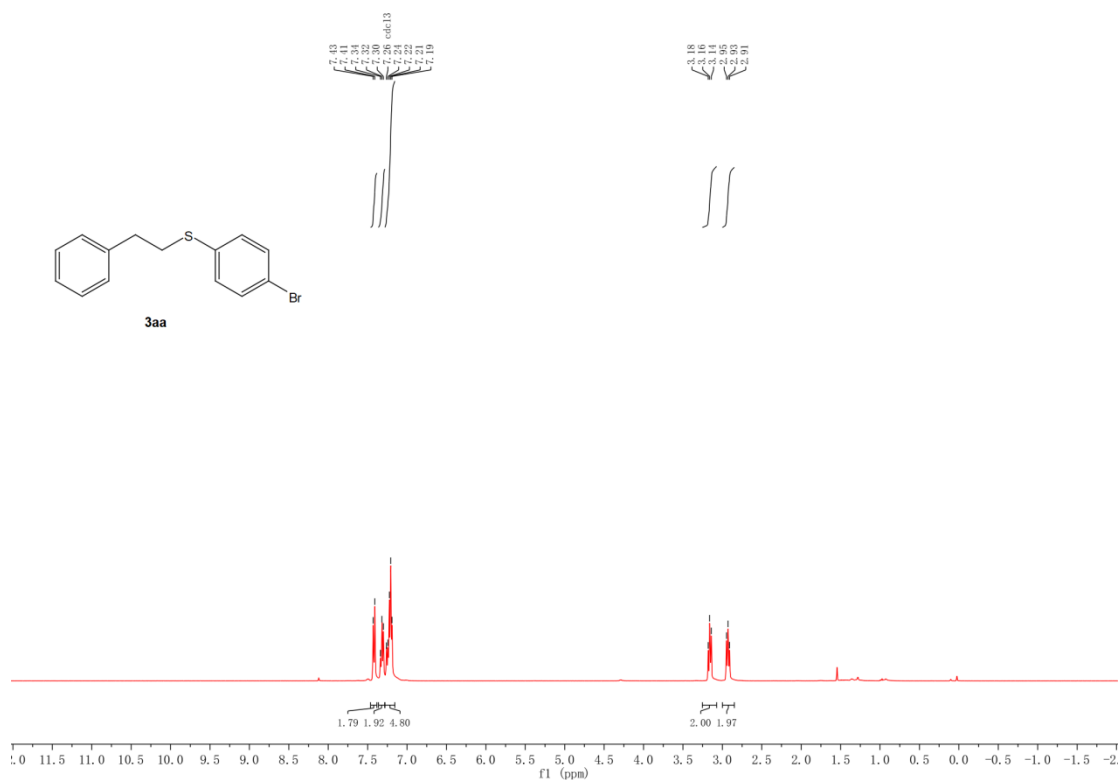

**Figure S1.**  $^1\text{H}$  NMR spectra (400 MHz) of **3aa** in  $\text{CDCl}_3$ .

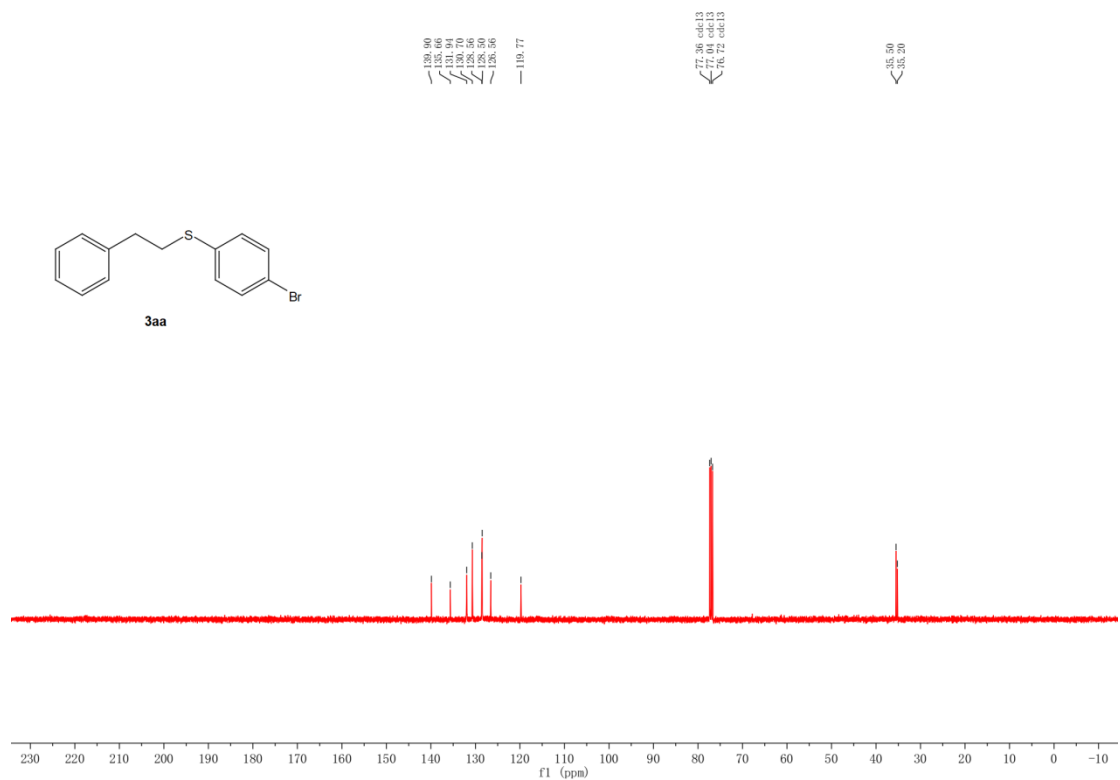

**Figure S2.**  $^{13}\text{C}$  NMR spectra (400 MHz) of **3aa** in  $\text{CDCl}_3$ .

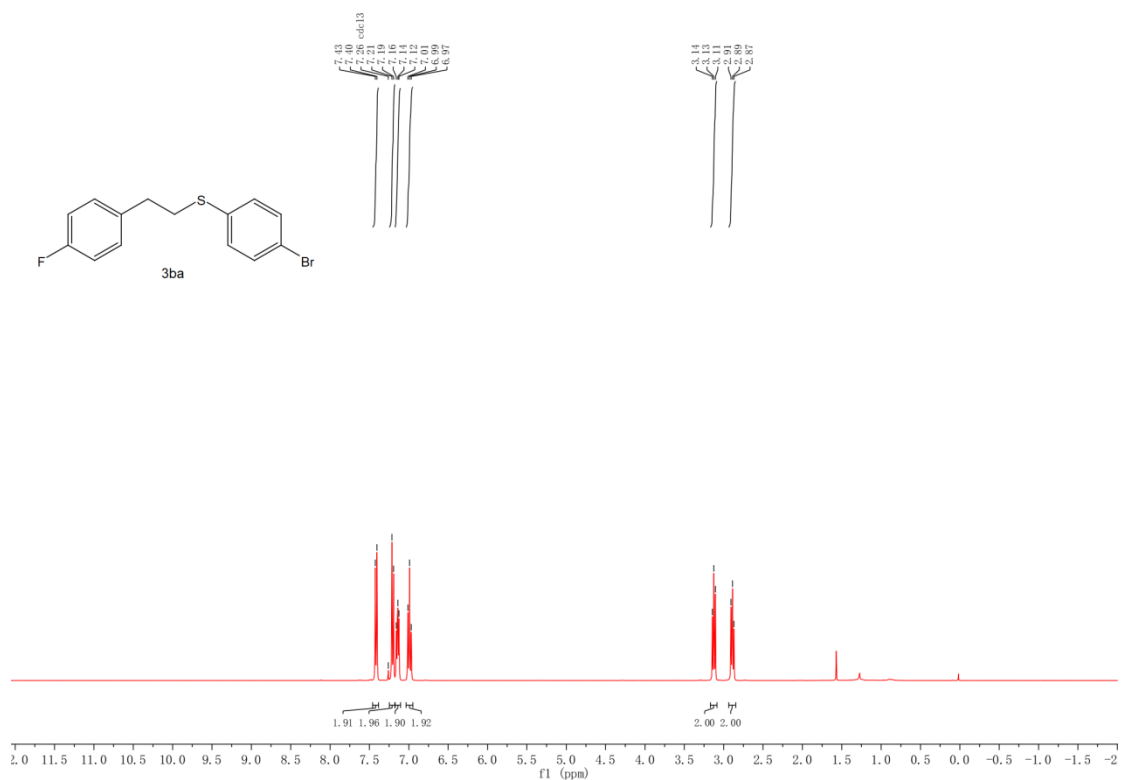

**Figure S3.** <sup>1</sup>H NMR spectra (400 MHz) of **3ba** in CDCl<sub>3</sub>.

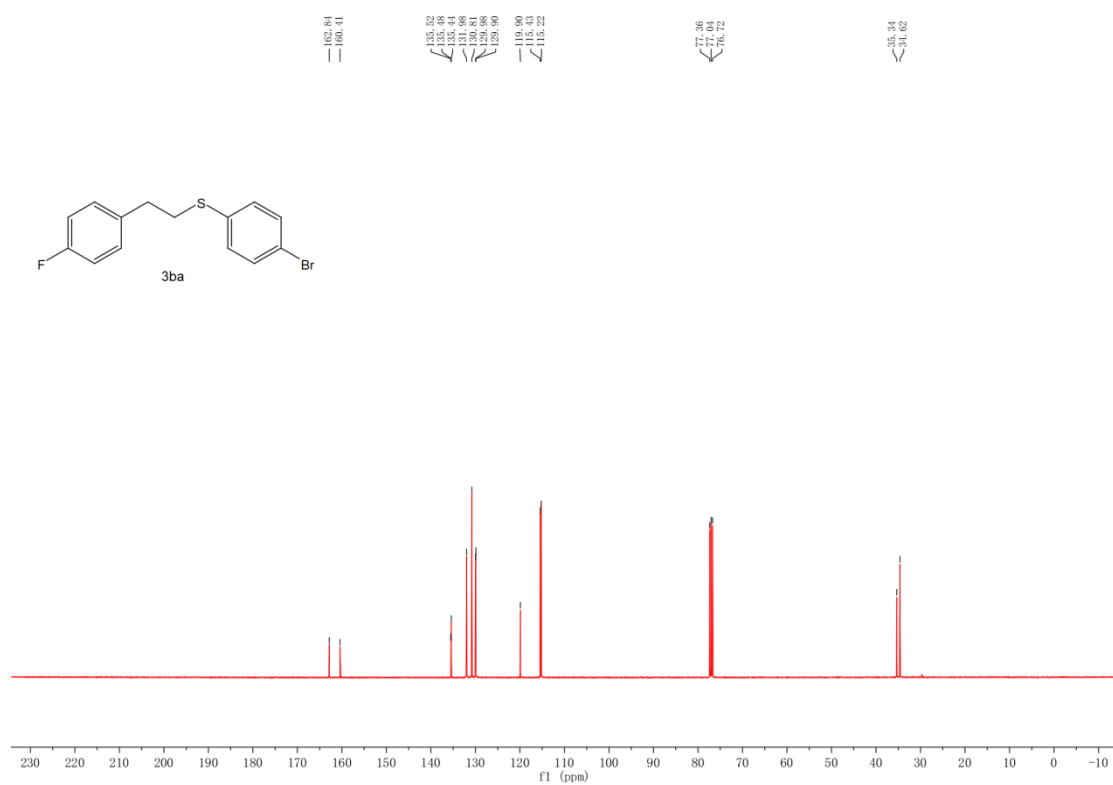

**Figure S4.** <sup>13</sup>C NMR spectra (400 MHz) of **3ba** in CDCl<sub>3</sub>.

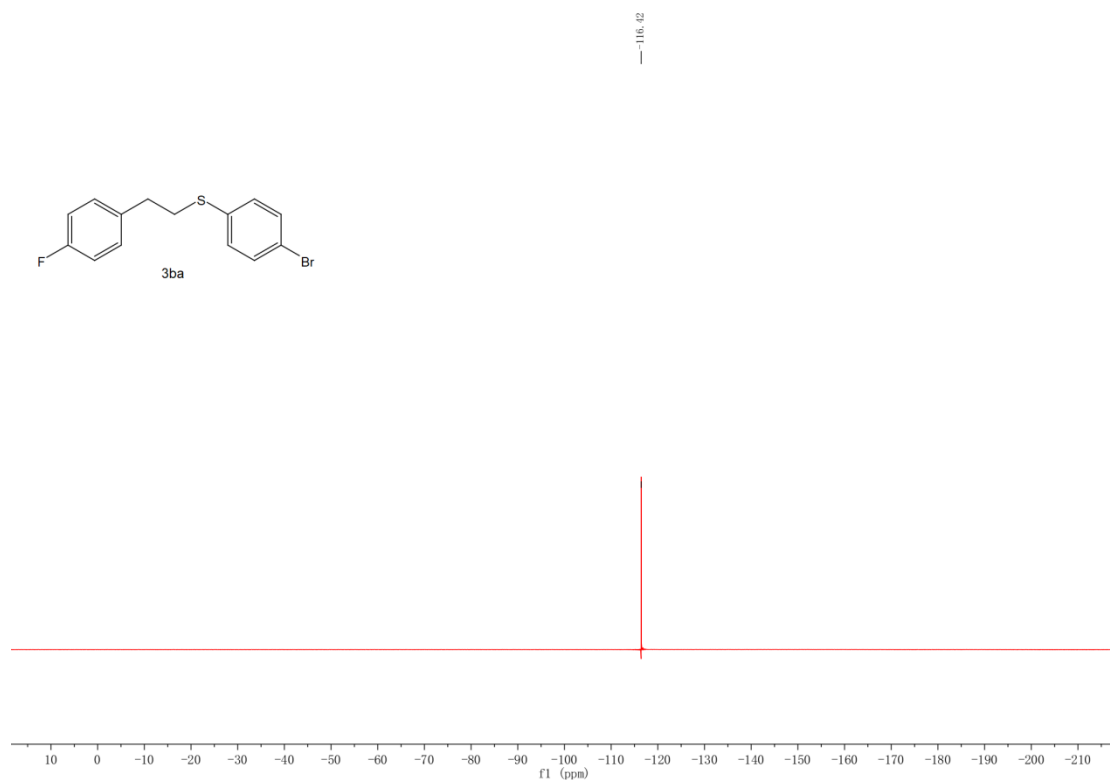

**Figure S5.**  $^{19}\text{F}$  NMR spectra (400 MHz) of **3ba** in  $\text{CDCl}_3$ .

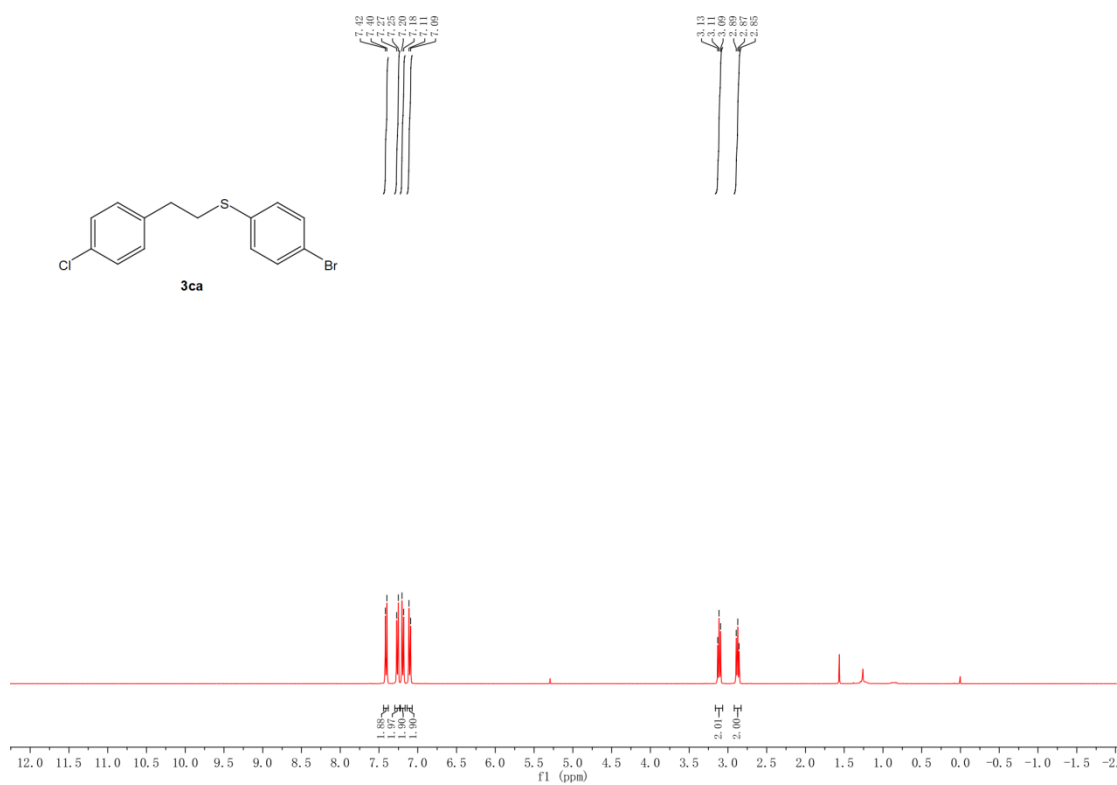

**Figure S6.**  $^1\text{H}$  NMR spectra (400 MHz) of **3ca** in  $\text{CDCl}_3$ .

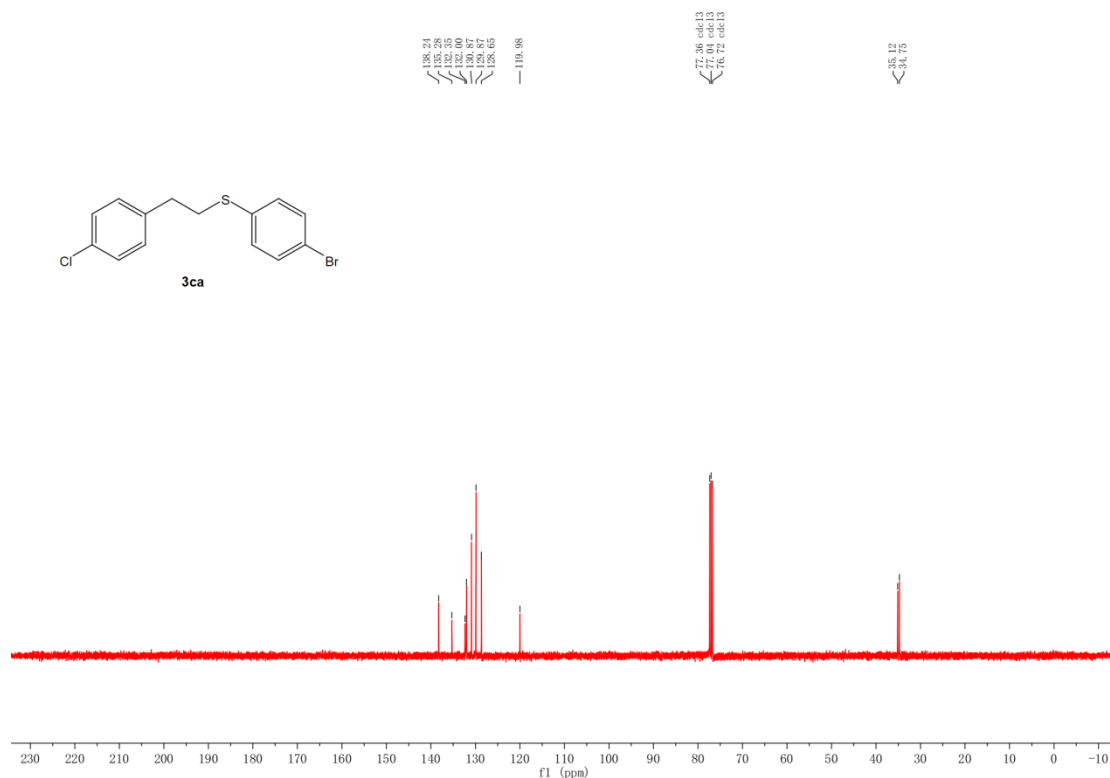

**Figure S7.**  $^{13}\text{C}$  NMR spectra (400 MHz) of **3ca** in  $\text{CDCl}_3$ .

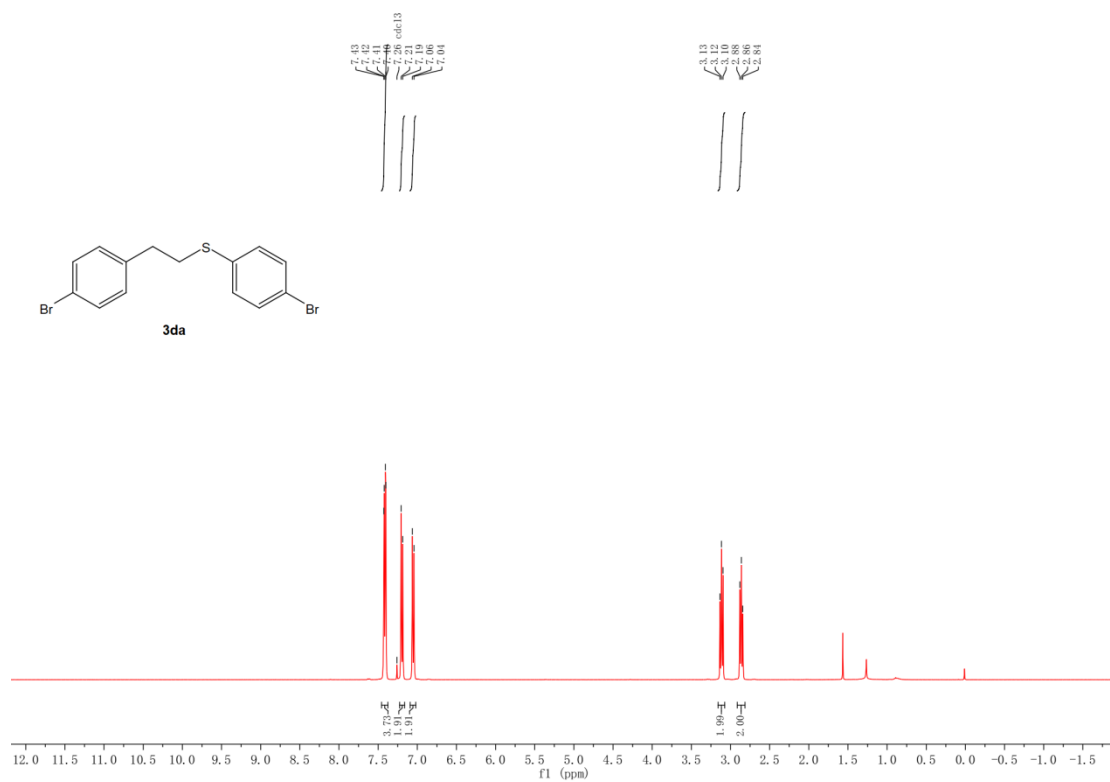

**Figure S8.**  $^1\text{H}$  NMR spectra (400 MHz) of **3da** in  $\text{CDCl}_3$ .



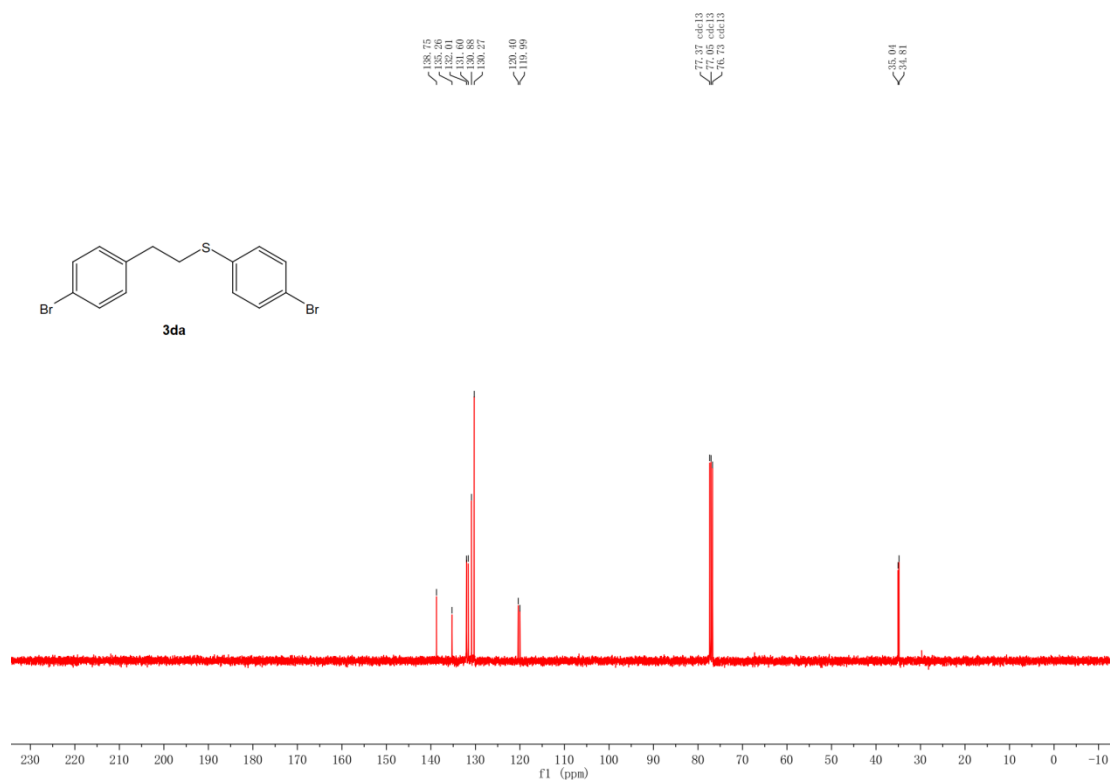

**Figure S9.** <sup>13</sup>C NMR spectra (400 MHz) of **3da** in CDCl<sub>3</sub>.

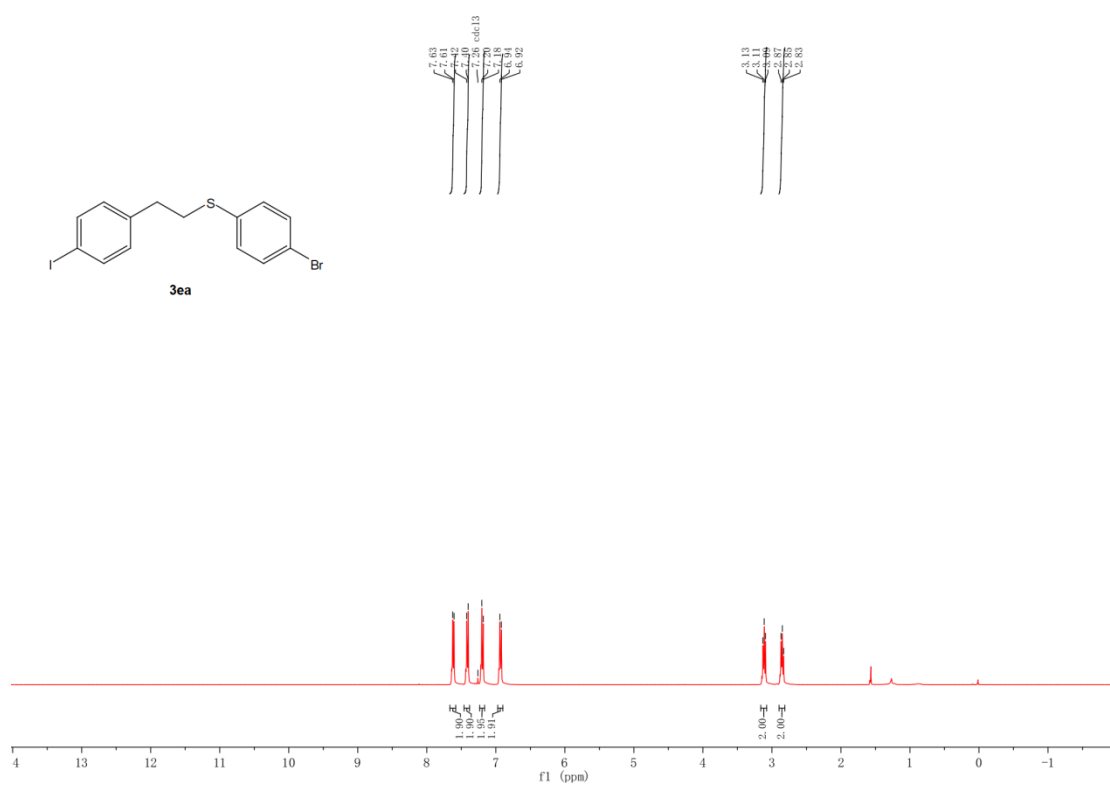

**Figure S10.** <sup>1</sup>H NMR spectra (400 MHz) of **3ea** in CDCl<sub>3</sub>.

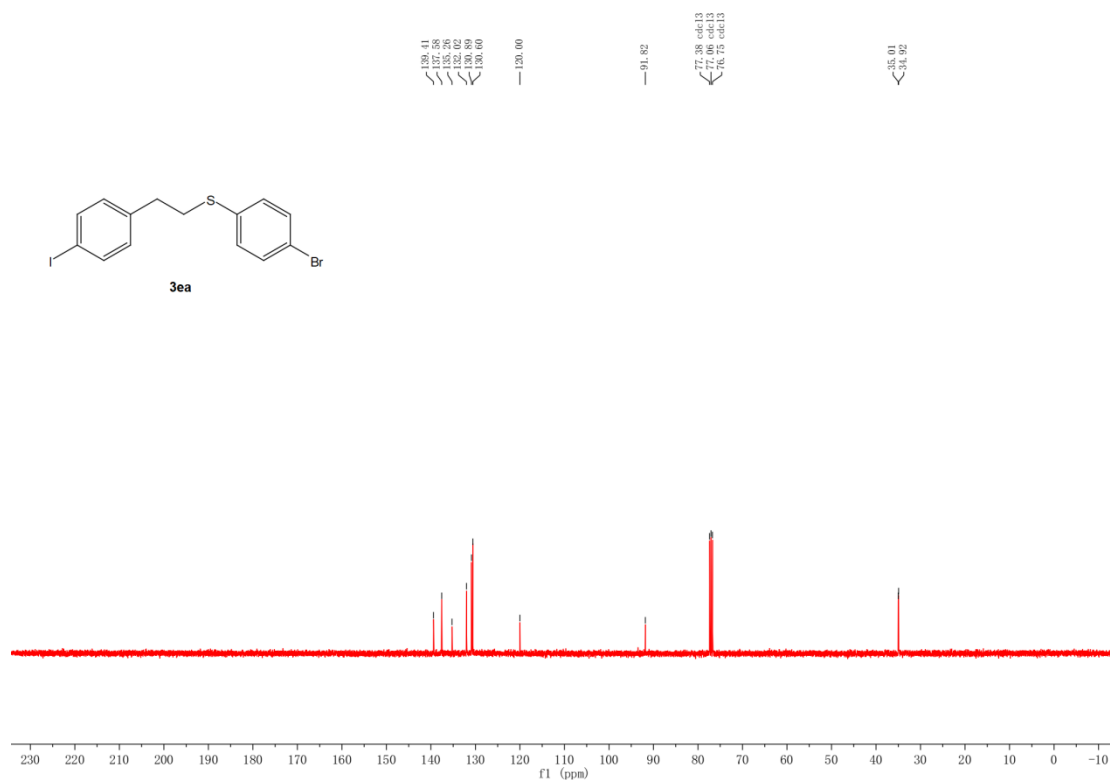

**Figure S11.**  $^{13}\text{C}$  NMR spectra (400 MHz) of **3ea** in  $\text{CDCl}_3$ .

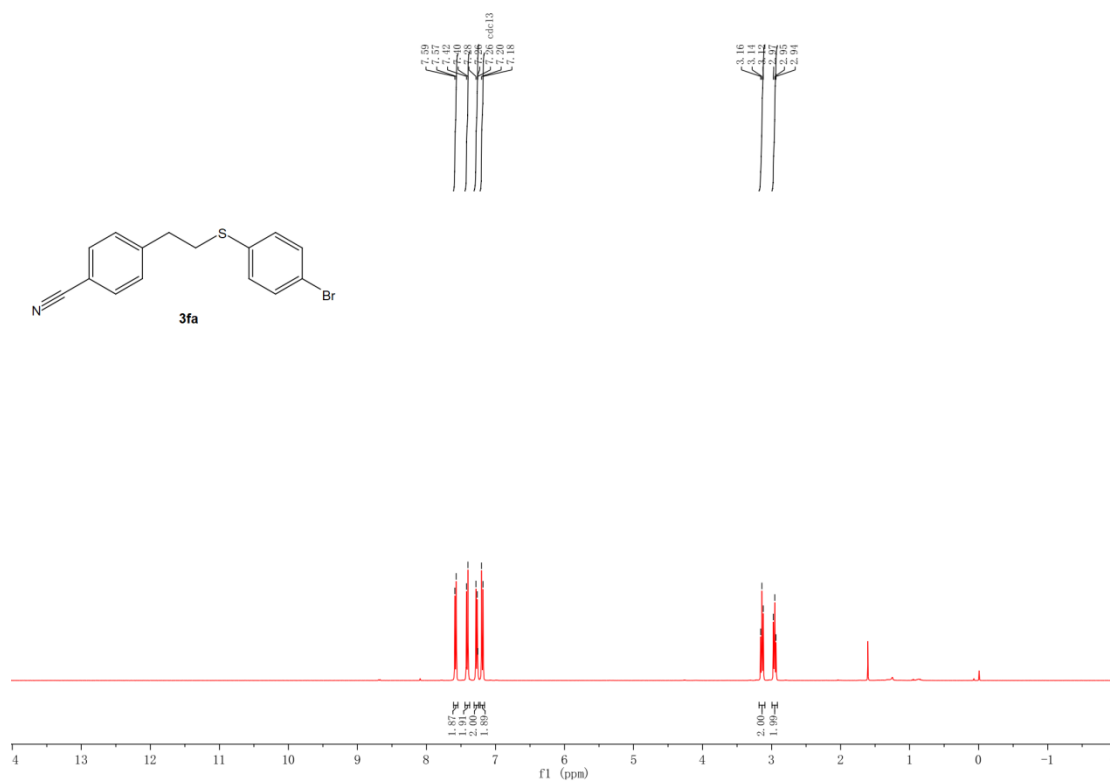



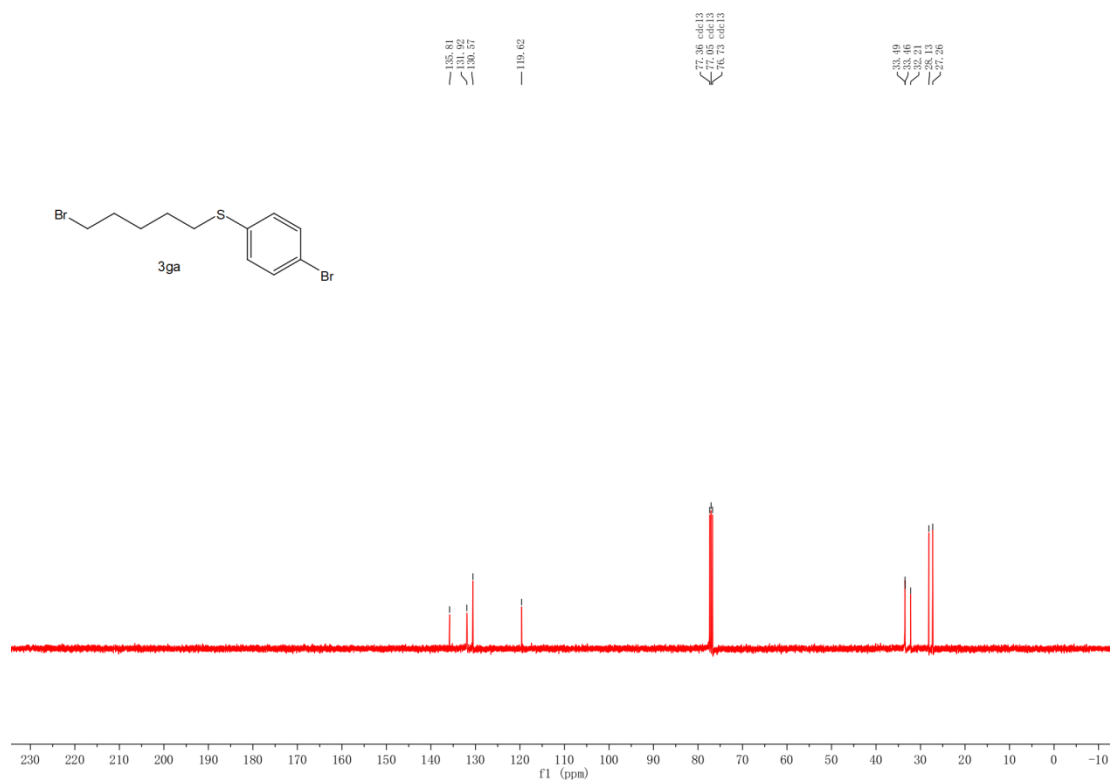

**Figure S15.**  $^{13}\text{C}$  NMR spectra (400 MHz) of **3ga** in  $\text{CDCl}_3$ .

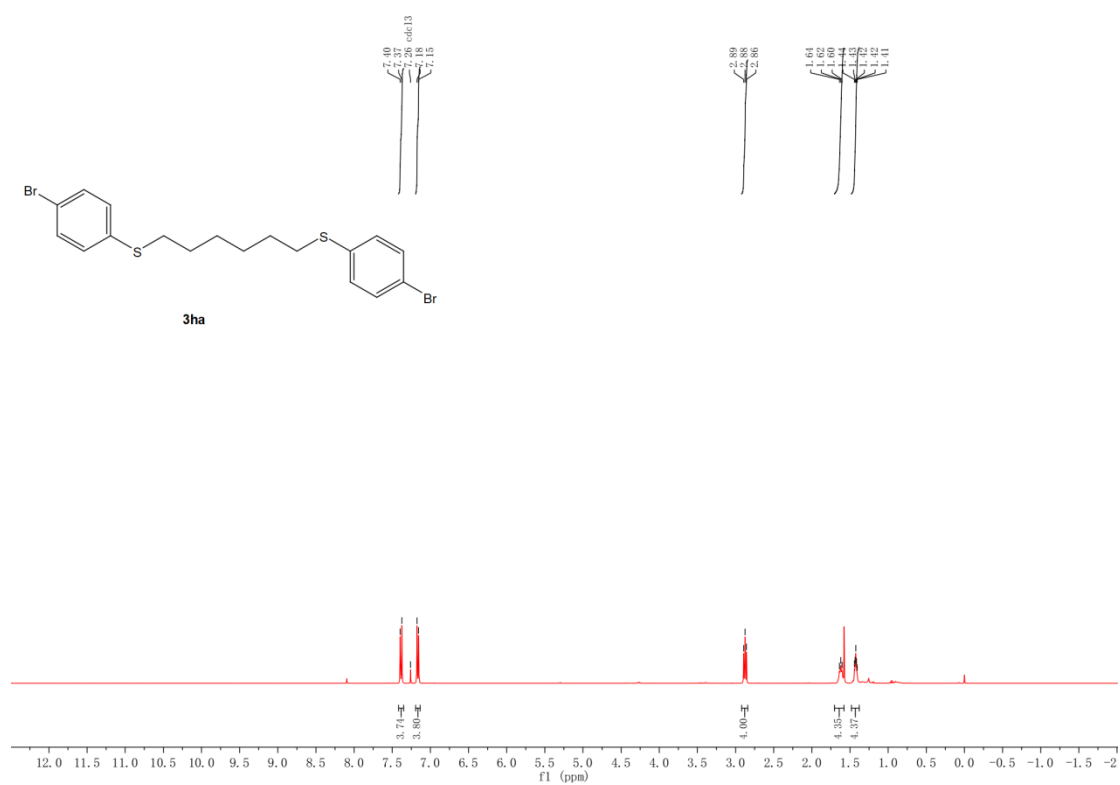

**Figure S16.**  $^1\text{H}$  NMR spectra (400 MHz) of **3ha** in  $\text{CDCl}_3$ .

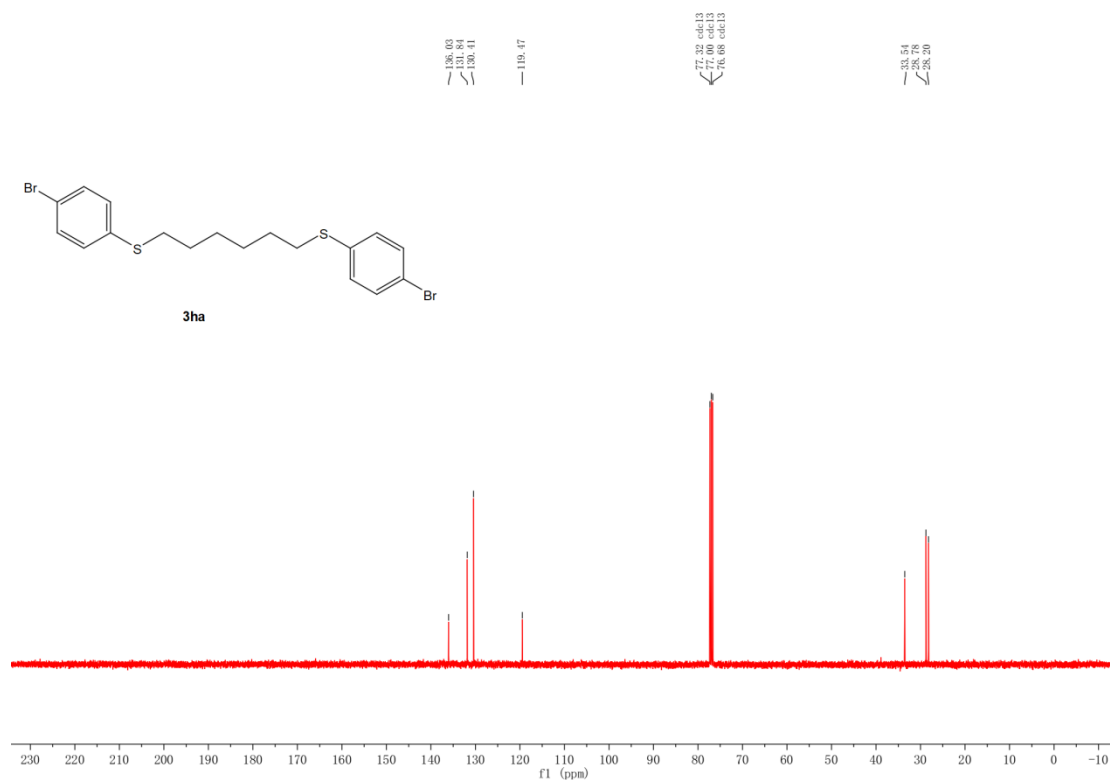

**Figure S17.**  $^{13}\text{C}$  NMR spectra (400 MHz) of **3ha** in  $\text{CDCl}_3$ .

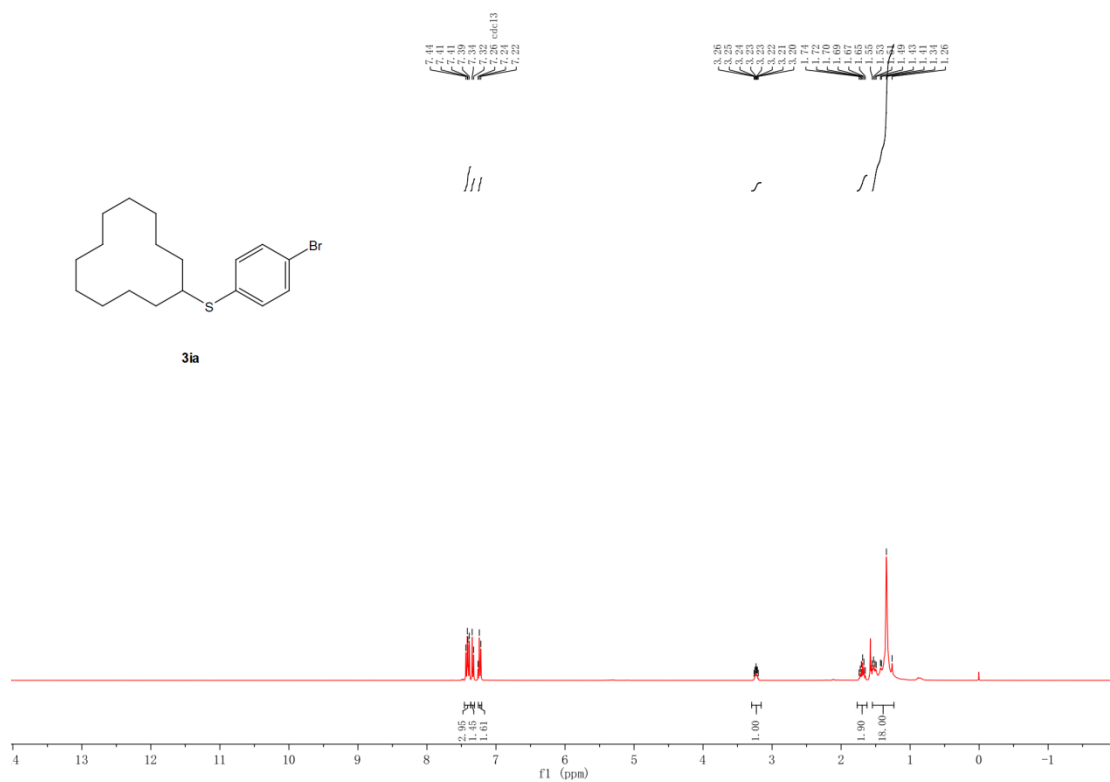

**Figure S18.**  $^1\text{H}$  NMR spectra (400 MHz) of **3ia** in  $\text{CDCl}_3$ .



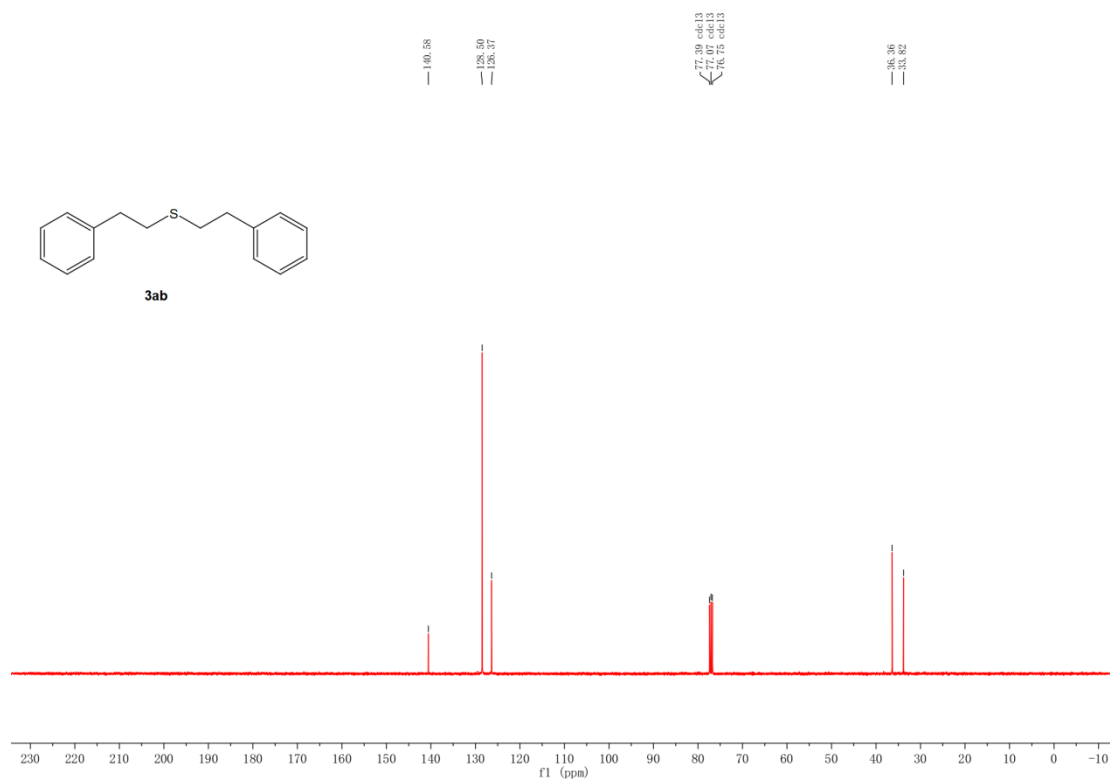

**Figure S21.**  $^{13}\text{C}$  NMR spectra (400 MHz) of **3ab** in  $\text{CDCl}_3$ .

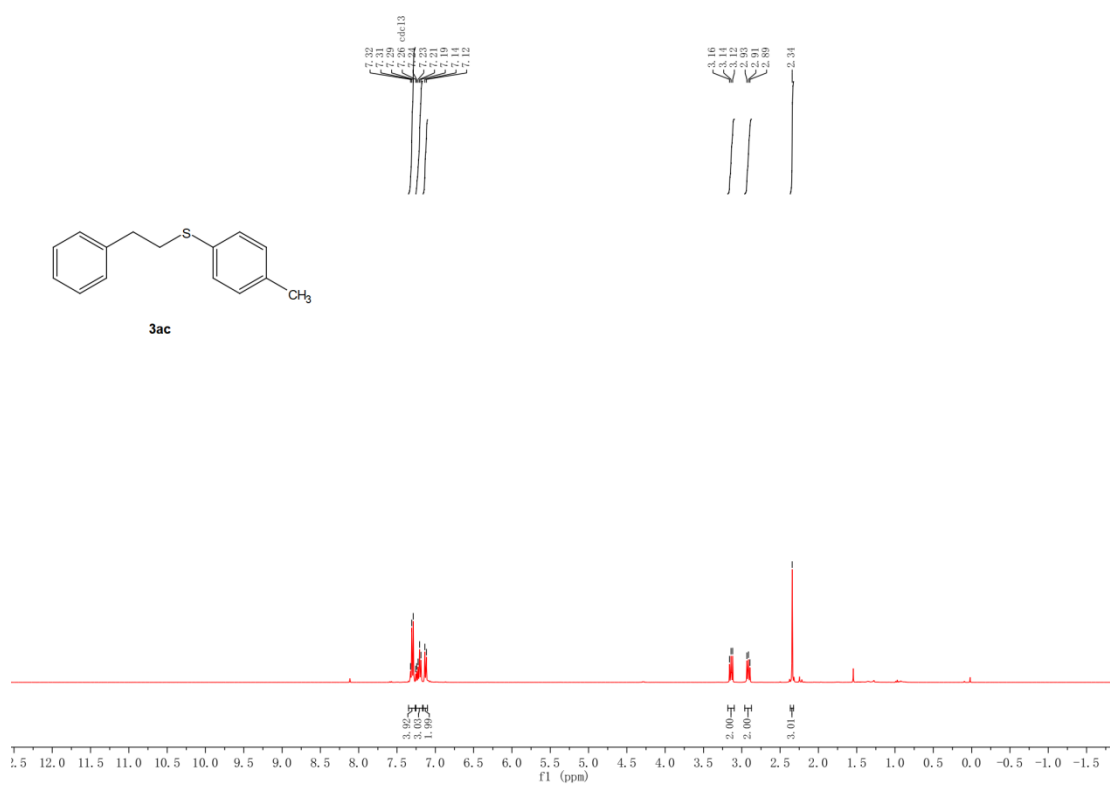

**Figure S22.**  $^1\text{H}$  NMR spectra (400 MHz) of **3ac** in  $\text{CDCl}_3$ .

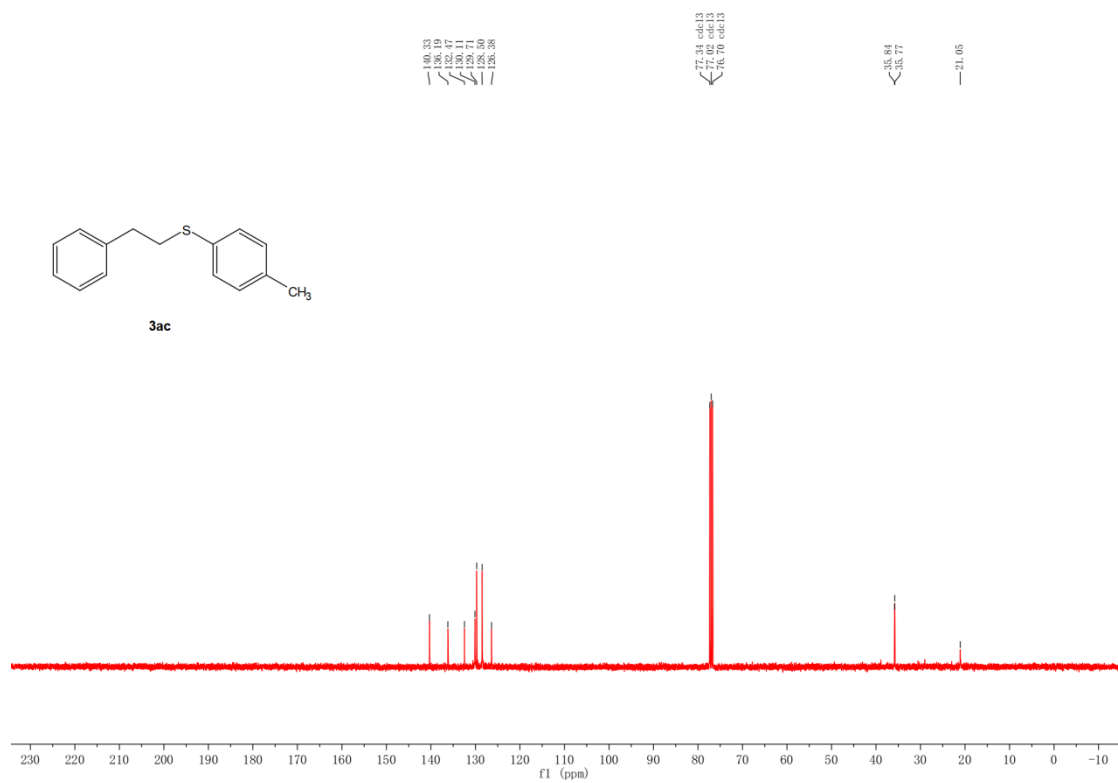

**Figure S23.**  $^{13}\text{C}$  NMR spectra (400 MHz) of **3ac** in  $\text{CDCl}_3$ .

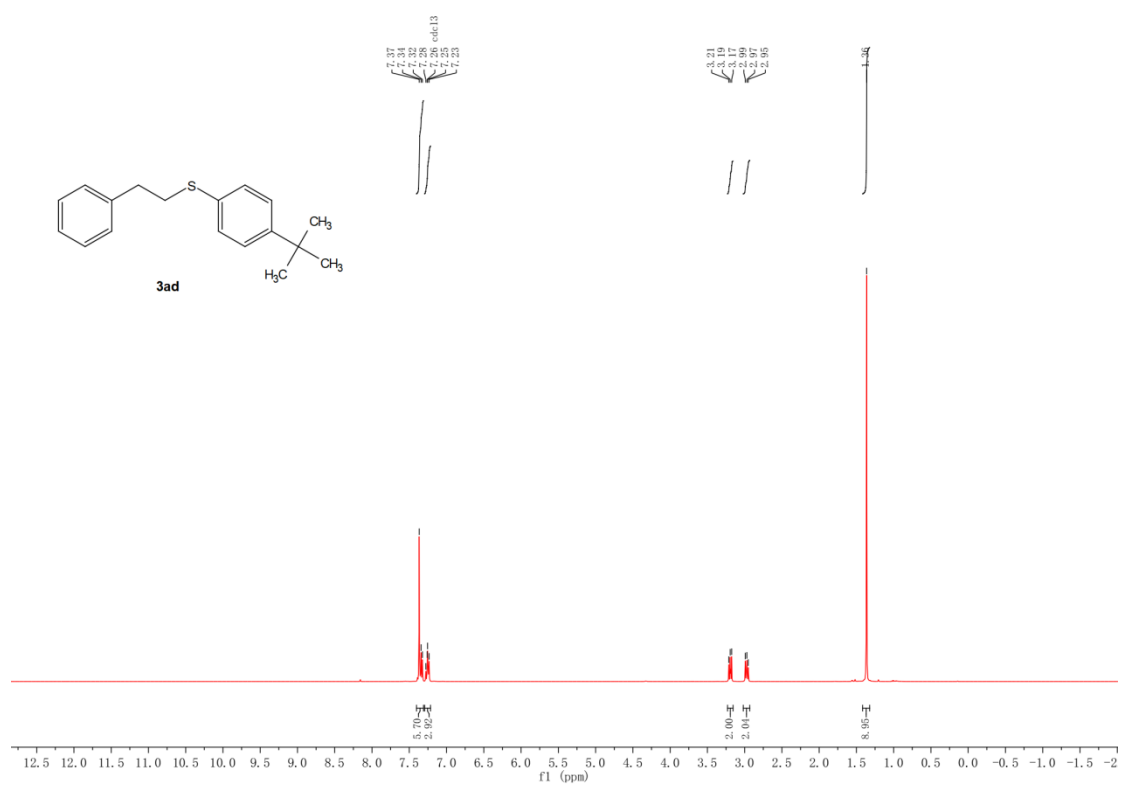

**Figure S24.**  $^1\text{H}$  NMR spectra (400 MHz) of **3ad** in  $\text{CDCl}_3$ .



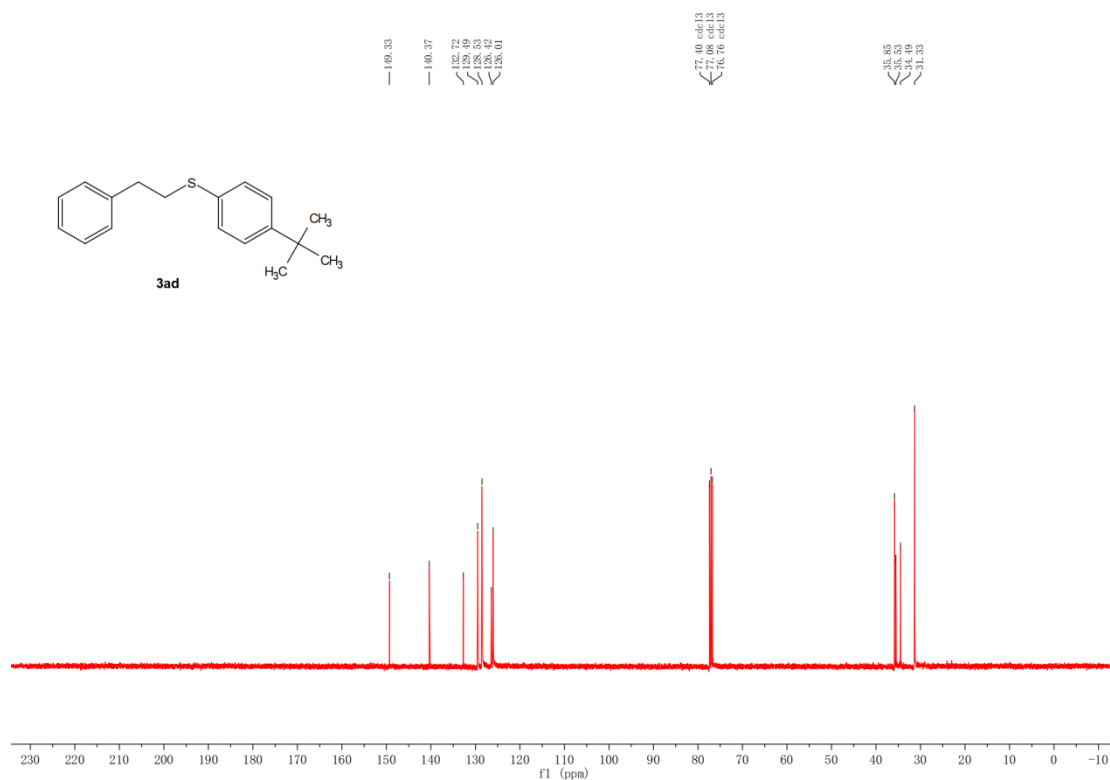

**Figure S25.** <sup>13</sup>C NMR spectra (400 MHz) of **3ad** in CDCl<sub>3</sub>.

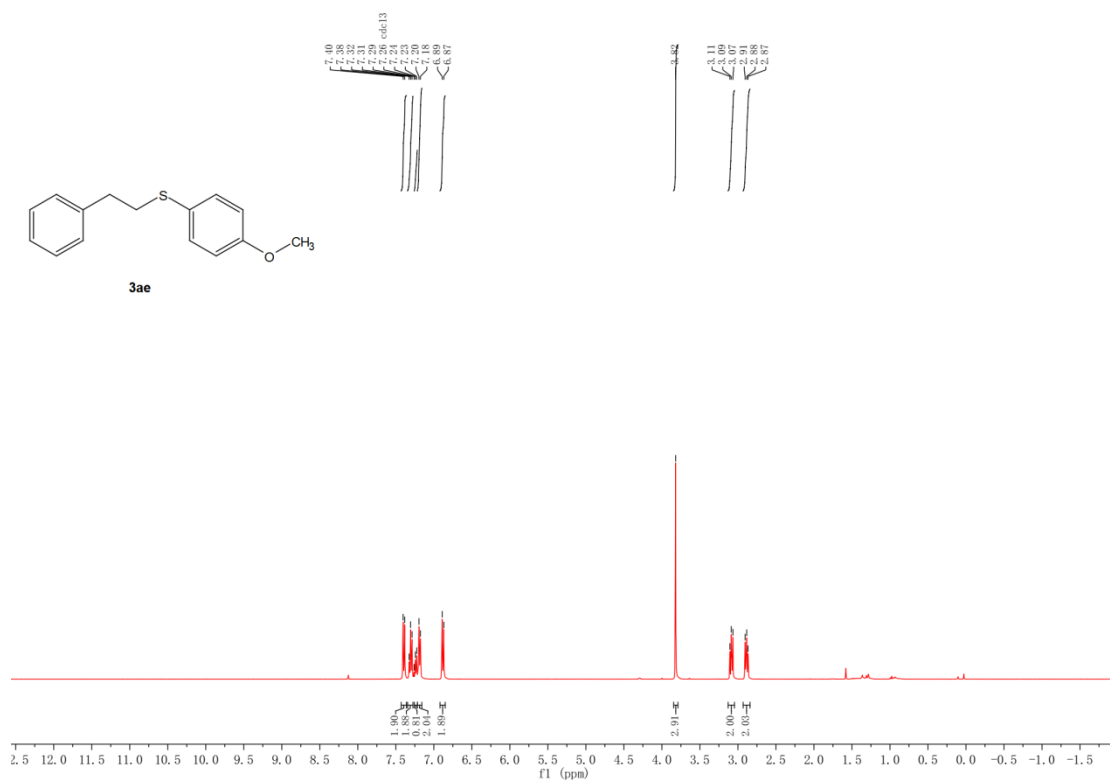

**Figure S26.** <sup>1</sup>H NMR spectra (400 MHz) of **3ae** in CDCl<sub>3</sub>.

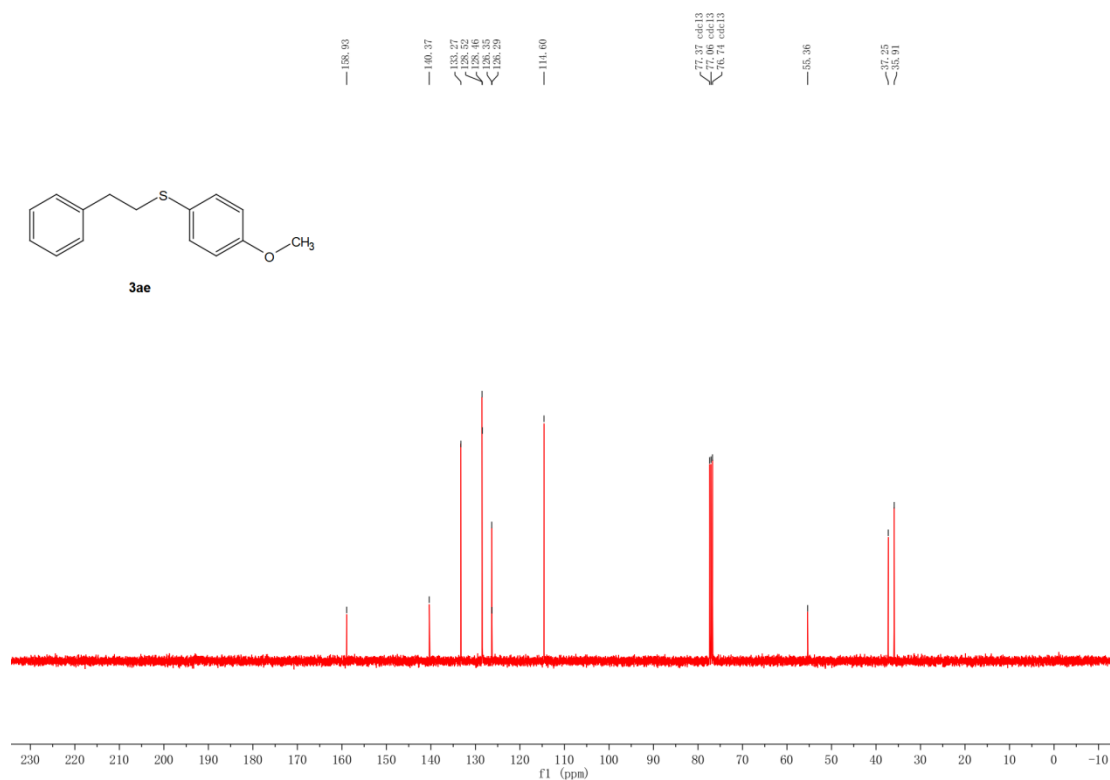

**Figure S27.**  $^{13}\text{C}$  NMR spectra (400 MHz) of **3ae** in  $\text{CDCl}_3$ .

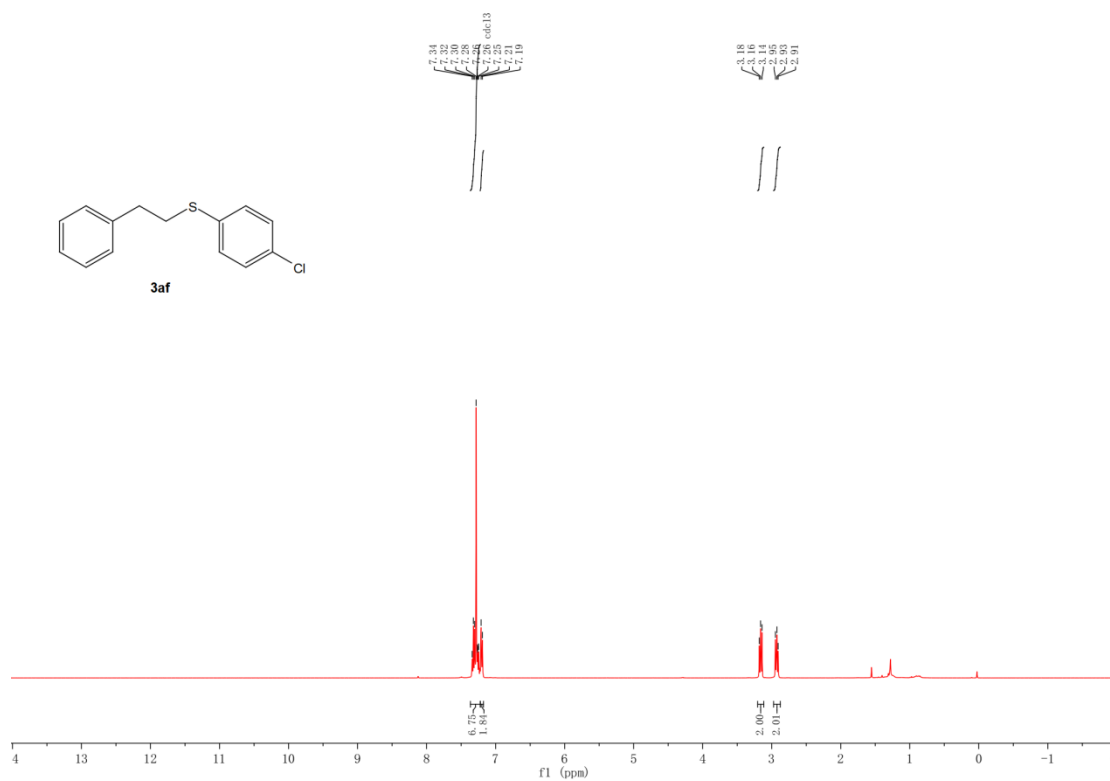

**Figure S28.**  $^1\text{H}$  NMR spectra (400 MHz) of **3af** in  $\text{CDCl}_3$ .

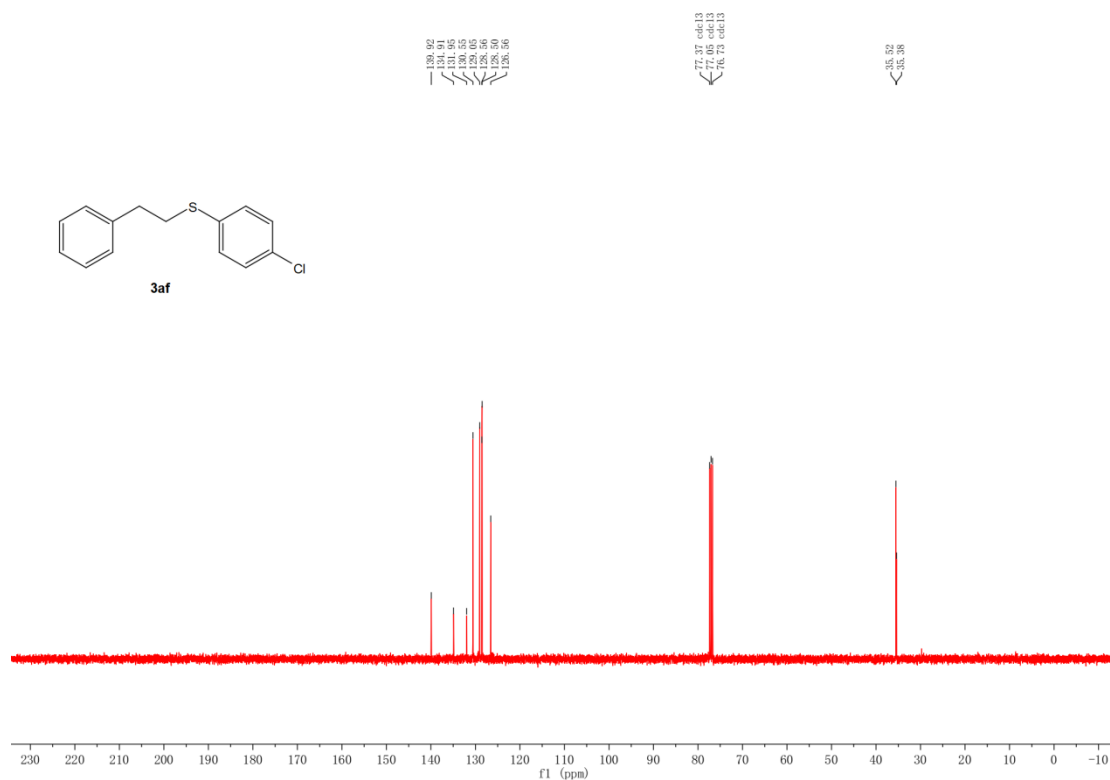

**Figure S29.**  $^{13}\text{C}$  NMR spectra (400 MHz) of **3af** in  $\text{CDCl}_3$ .

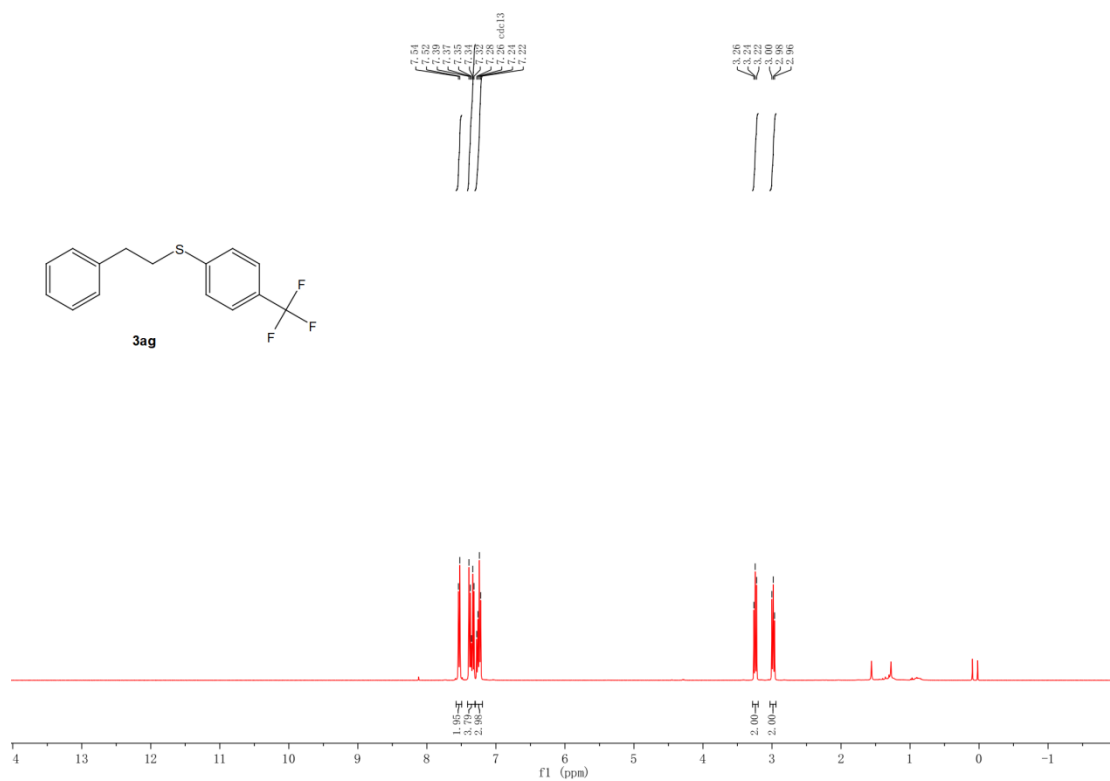

**Figure S30.**  $^1\text{H}$  NMR spectra (400 MHz) of **3ag** in  $\text{CDCl}_3$ .

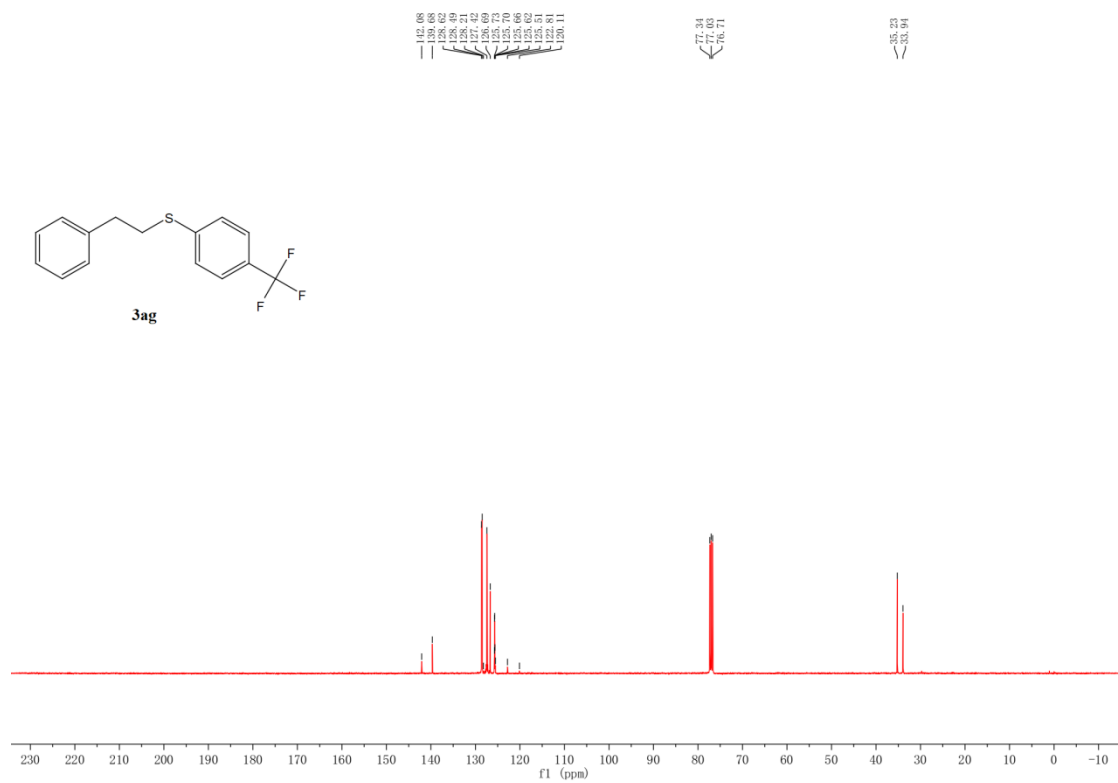

**Figure S31.** <sup>13</sup>C NMR spectra (400 MHz) of **3ag** in CDCl<sub>3</sub>.

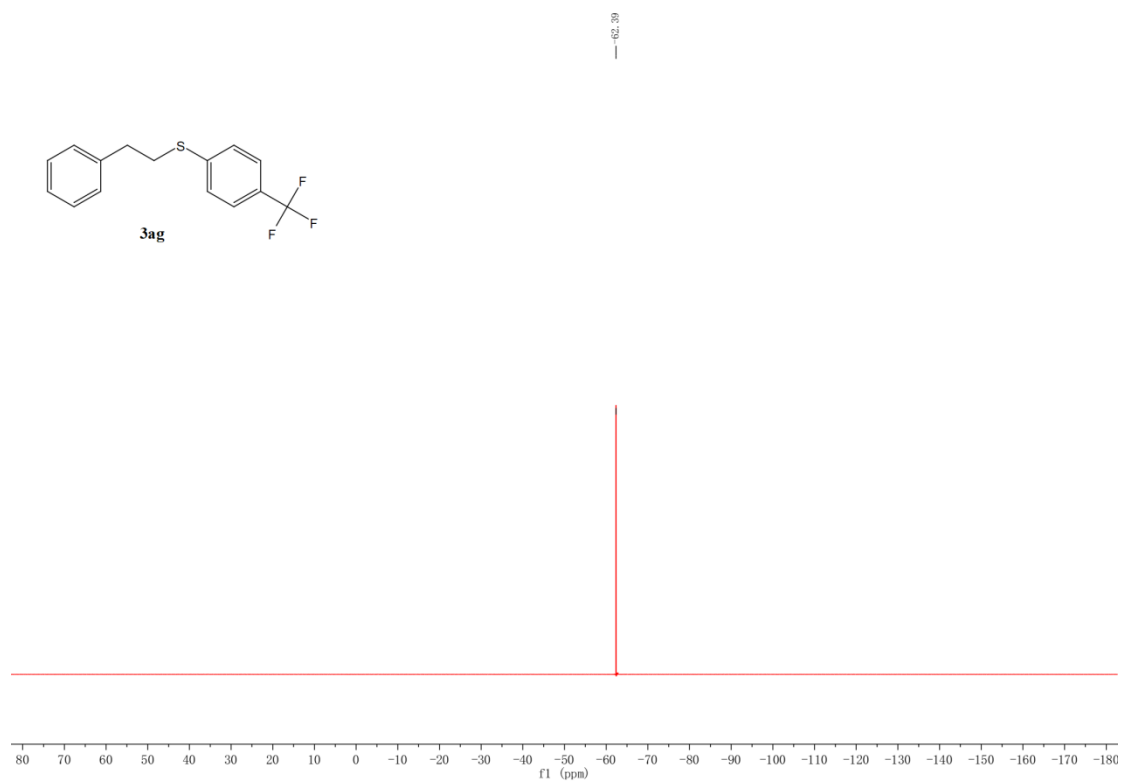

**Figure S32.** <sup>19</sup>F NMR spectra (400 MHz) of **3ag** in CDCl<sub>3</sub>.

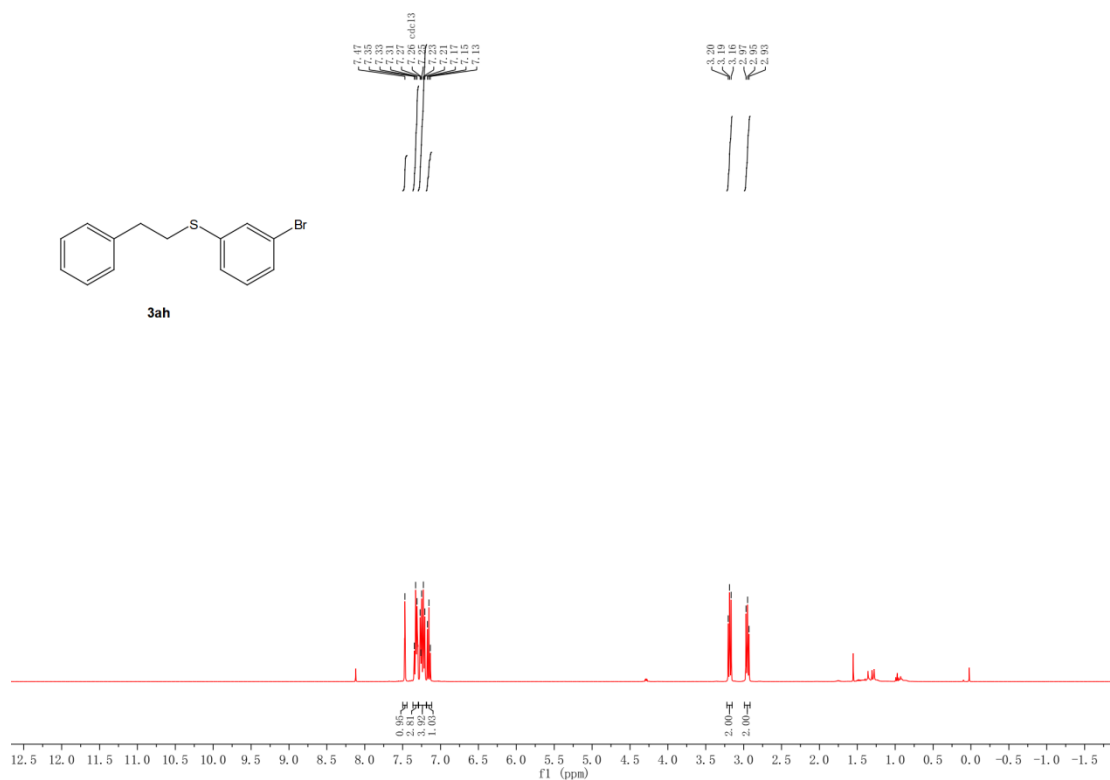

**Figure S33.** <sup>1</sup>H NMR spectra (400 MHz) of **3ah** in CDCl<sub>3</sub>.

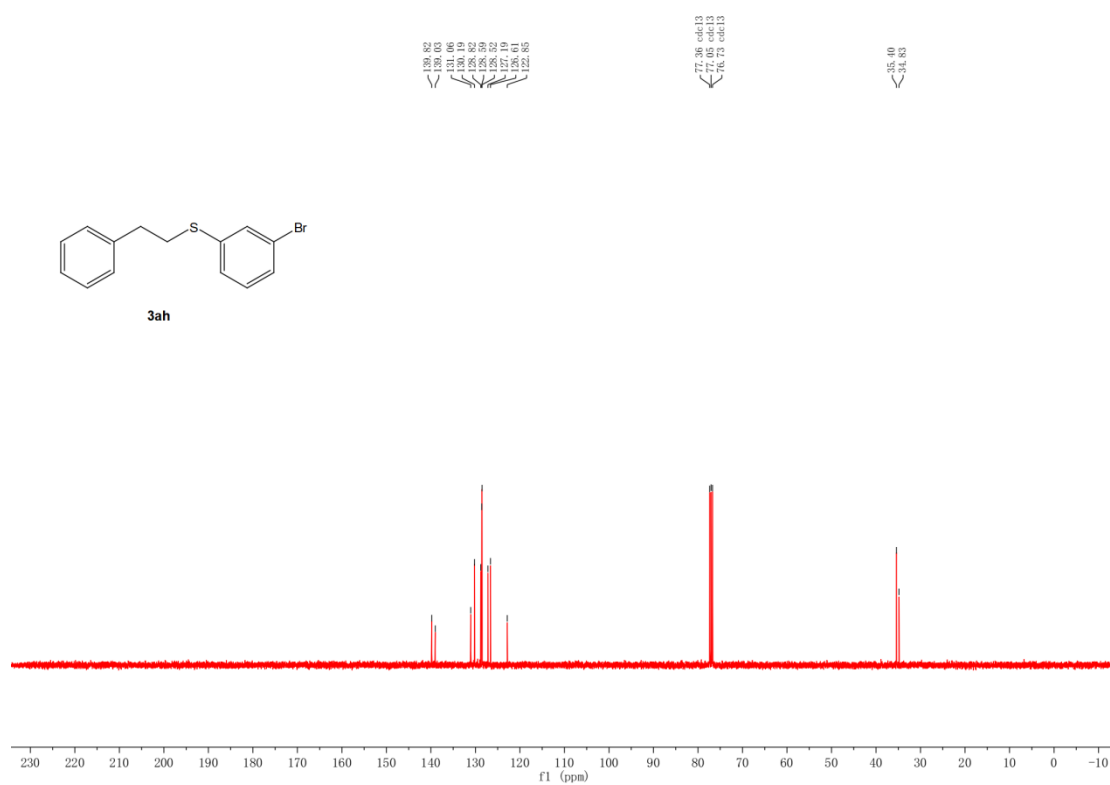

**Figure S34.** <sup>13</sup>C NMR spectra (400 MHz) of **3ah** in CDCl<sub>3</sub>.



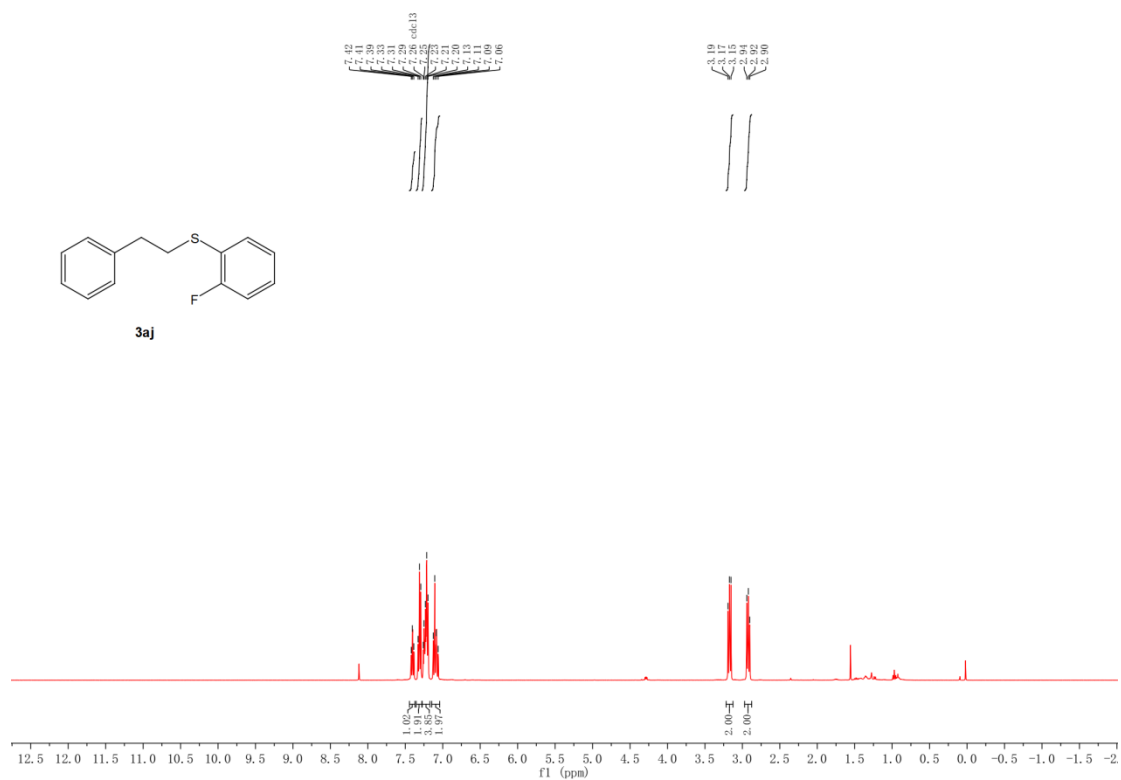

**Figure S37.** <sup>1</sup>H NMR spectra (400 MHz) of **3aj** in CDCl<sub>3</sub>.

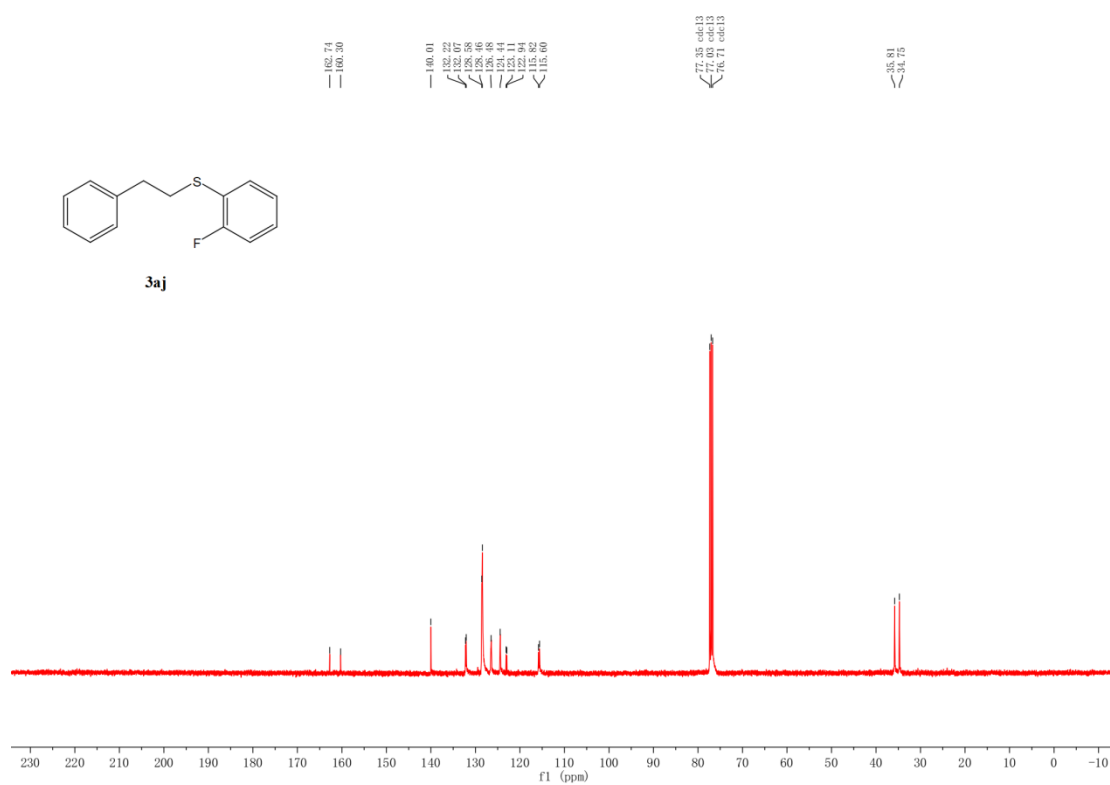

**Figure S38.** <sup>13</sup>C NMR spectra (400 MHz) of **3aj** in CDCl<sub>3</sub>.

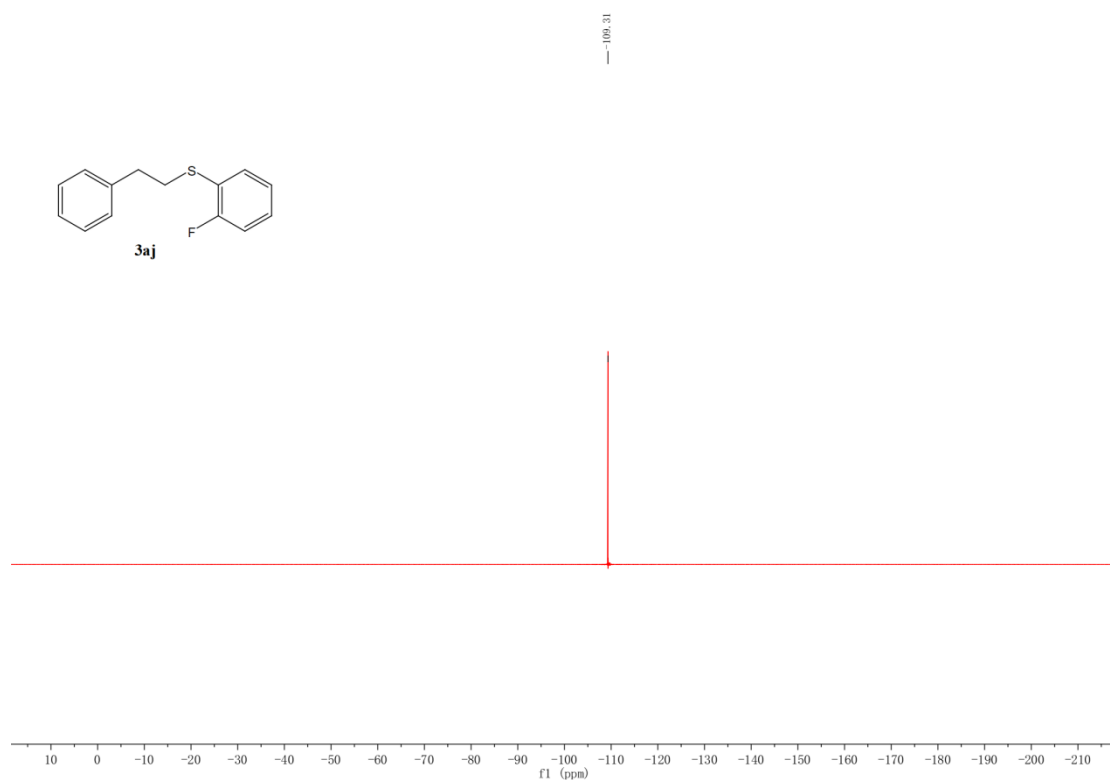

**Figure S39.**  $^{19}\text{F}$  NMR spectra (400 MHz) of **3aj** in  $\text{CDCl}_3$ .

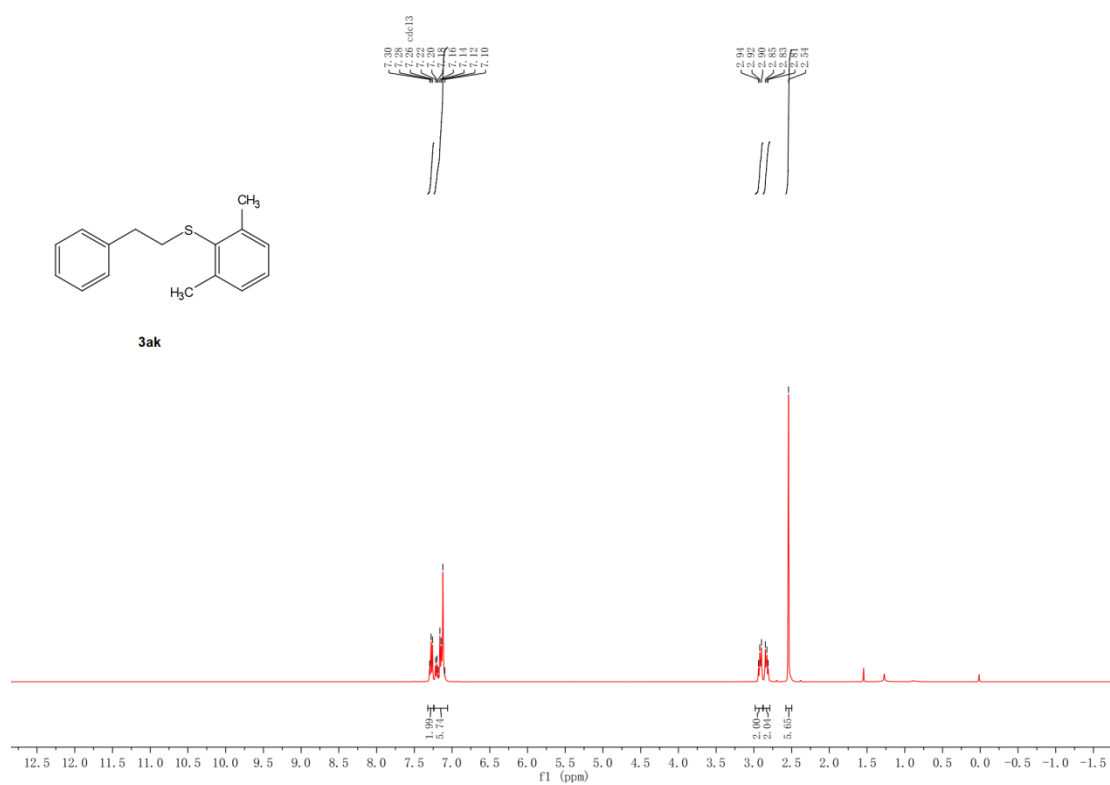

**Figure S40.**  $^1\text{H}$  NMR spectra (400 MHz) of **3ak** in  $\text{CDCl}_3$ .





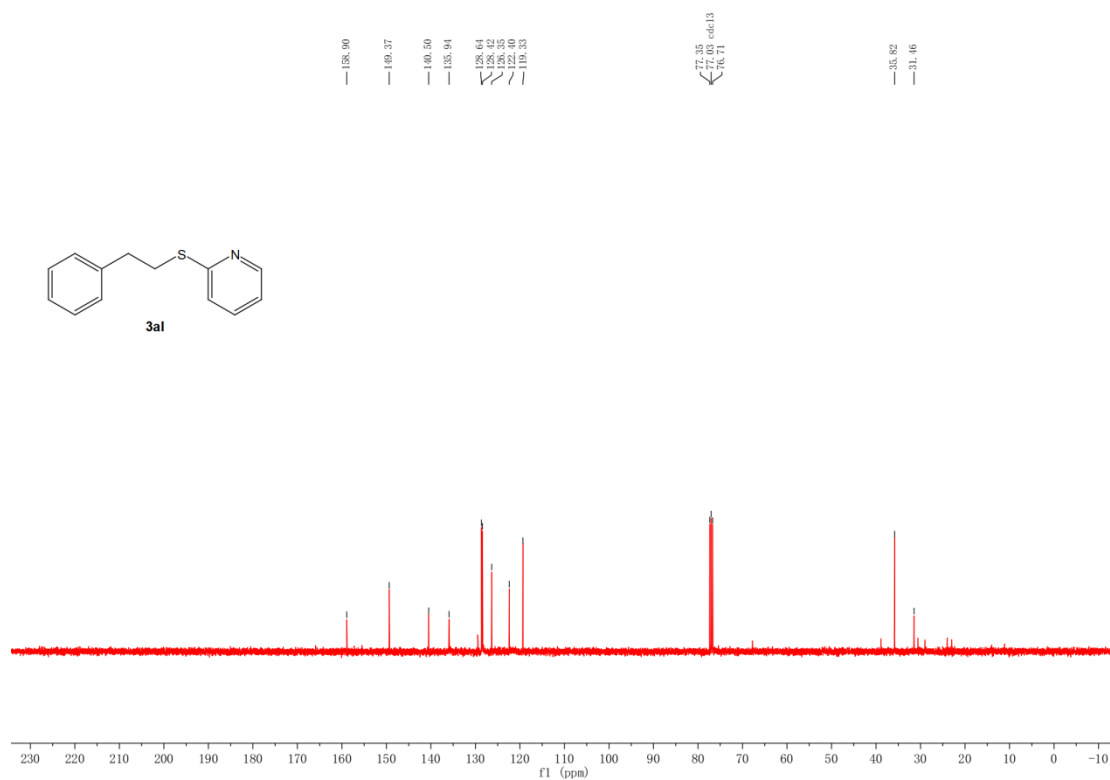

**Figure S43.**  $^{13}\text{C}$  NMR spectra (400 MHz) of **3al** in  $\text{CDCl}_3$ .

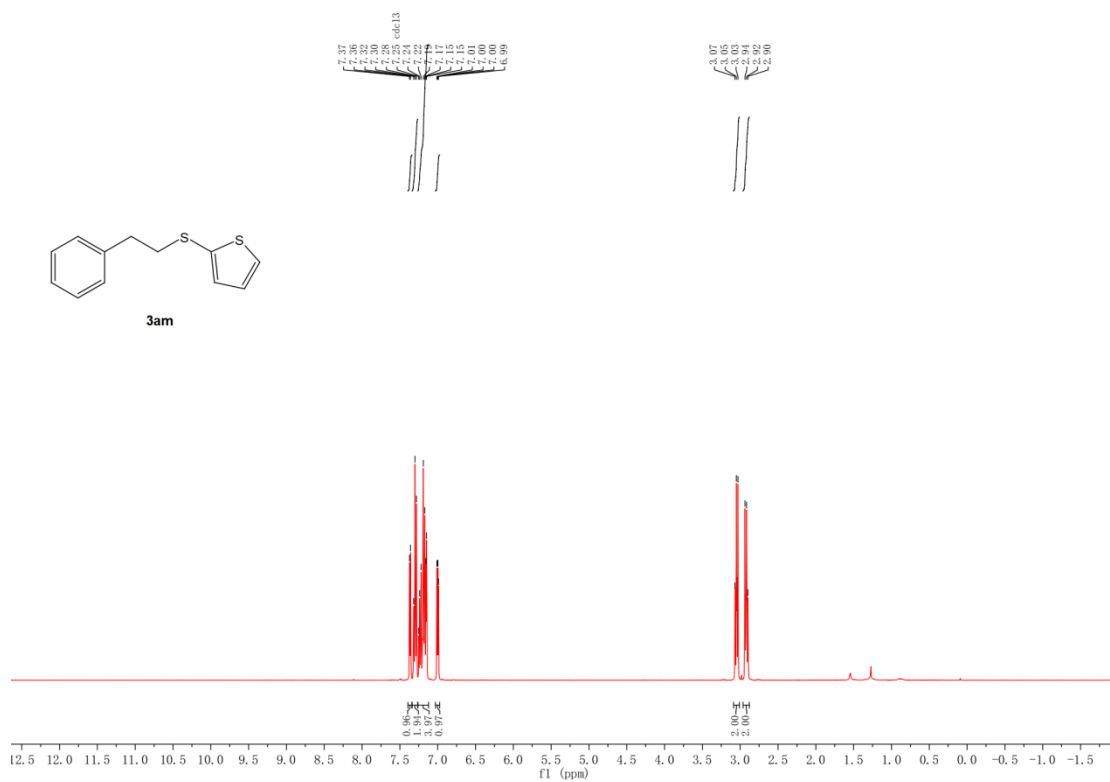

**Figure S44.**  $^1\text{H}$  NMR spectra (400 MHz) of **3am** in  $\text{CDCl}_3$ .

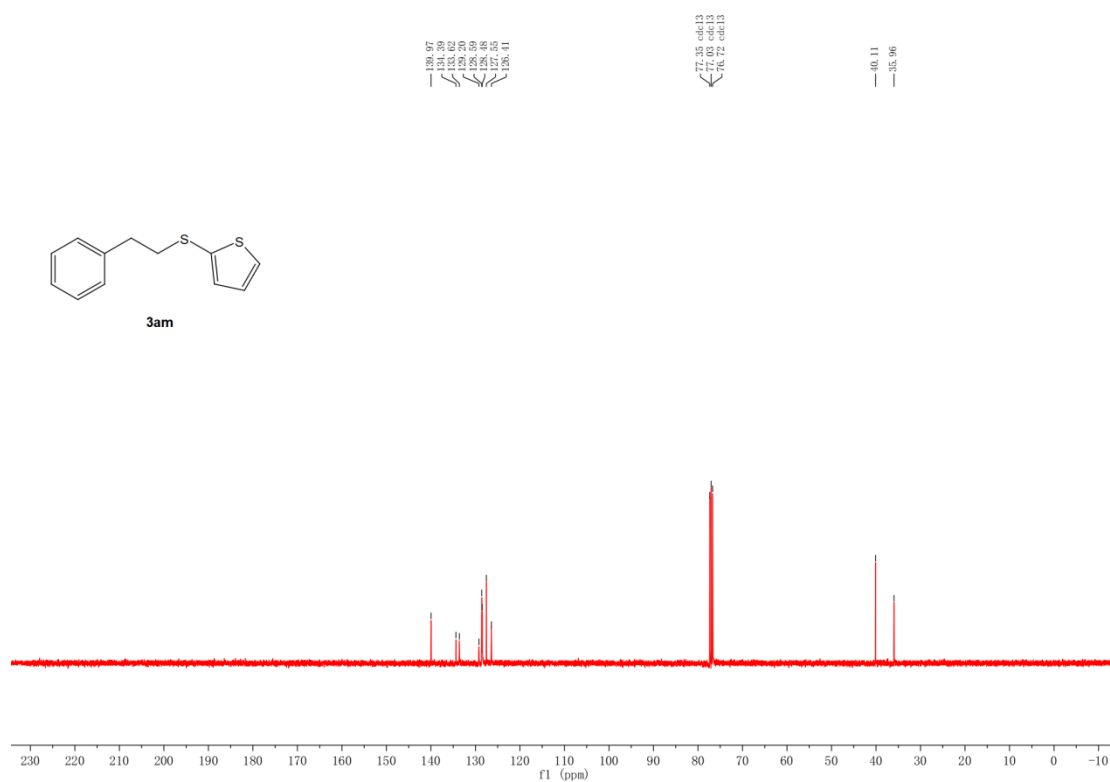

**Figure S45.** <sup>13</sup>C NMR spectra (400 MHz) of **3am** in CDCl<sub>3</sub>.

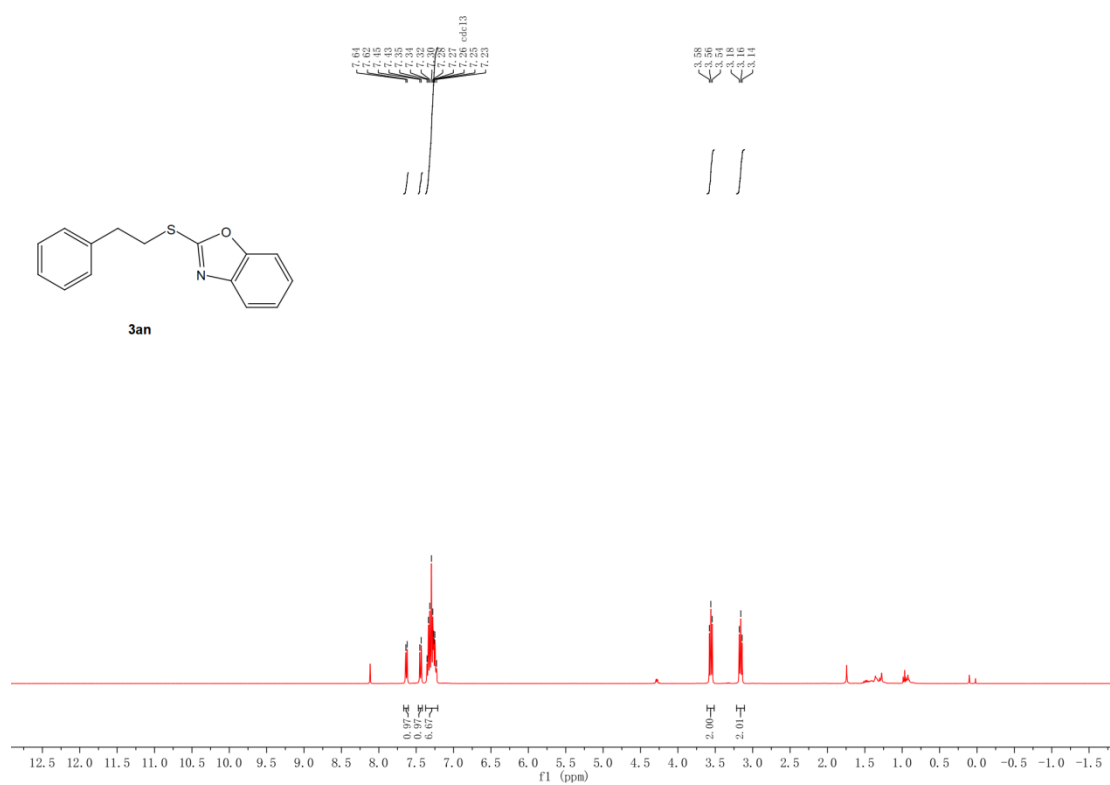

**Figure S46.** <sup>1</sup>H NMR spectra (400 MHz) of **3an** in CDCl<sub>3</sub>.

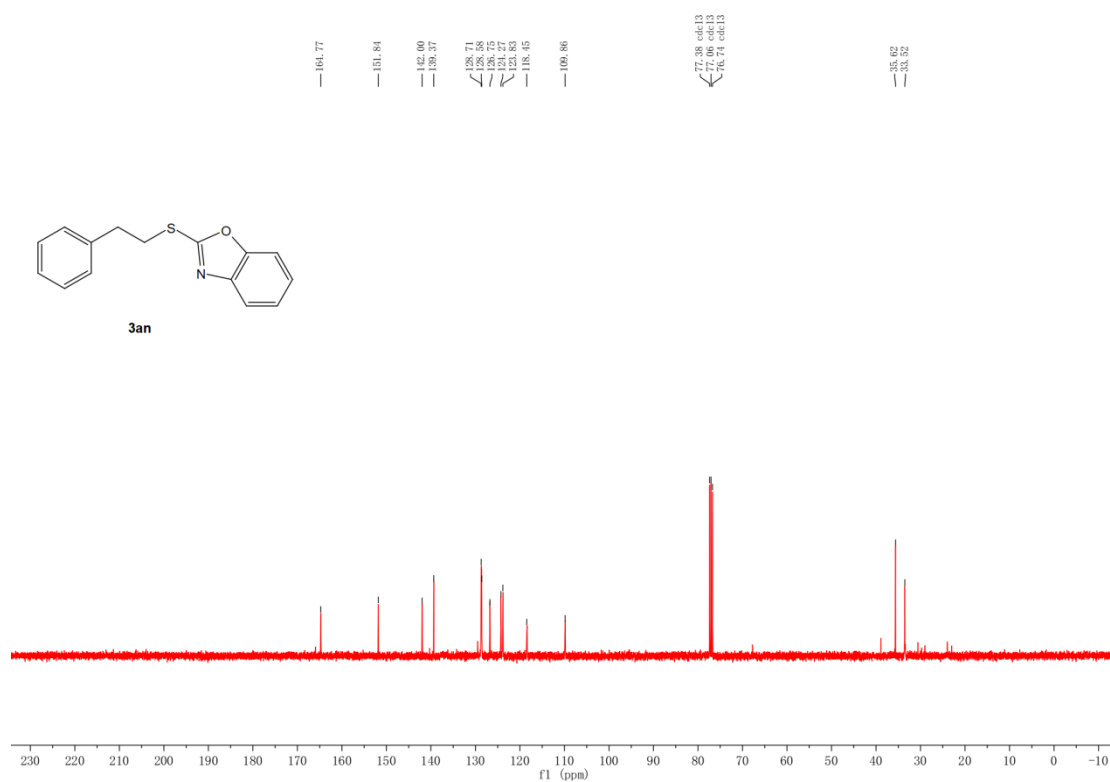

**Figure S47.**  $^{13}\text{C}$  NMR spectra (400 MHz) of **3an** in  $\text{CDCl}_3$ .

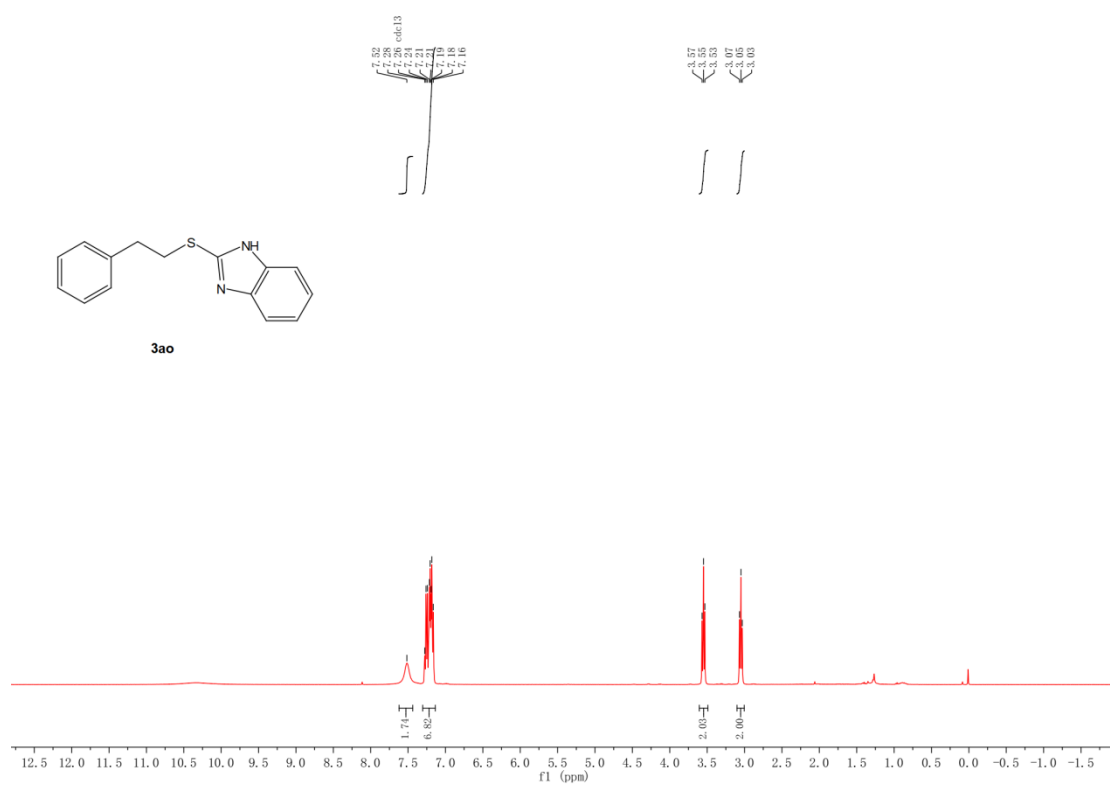

**Figure S48.**  $^1\text{H}$  NMR spectra (400 MHz) of **3ao** in  $\text{CDCl}_3$ .

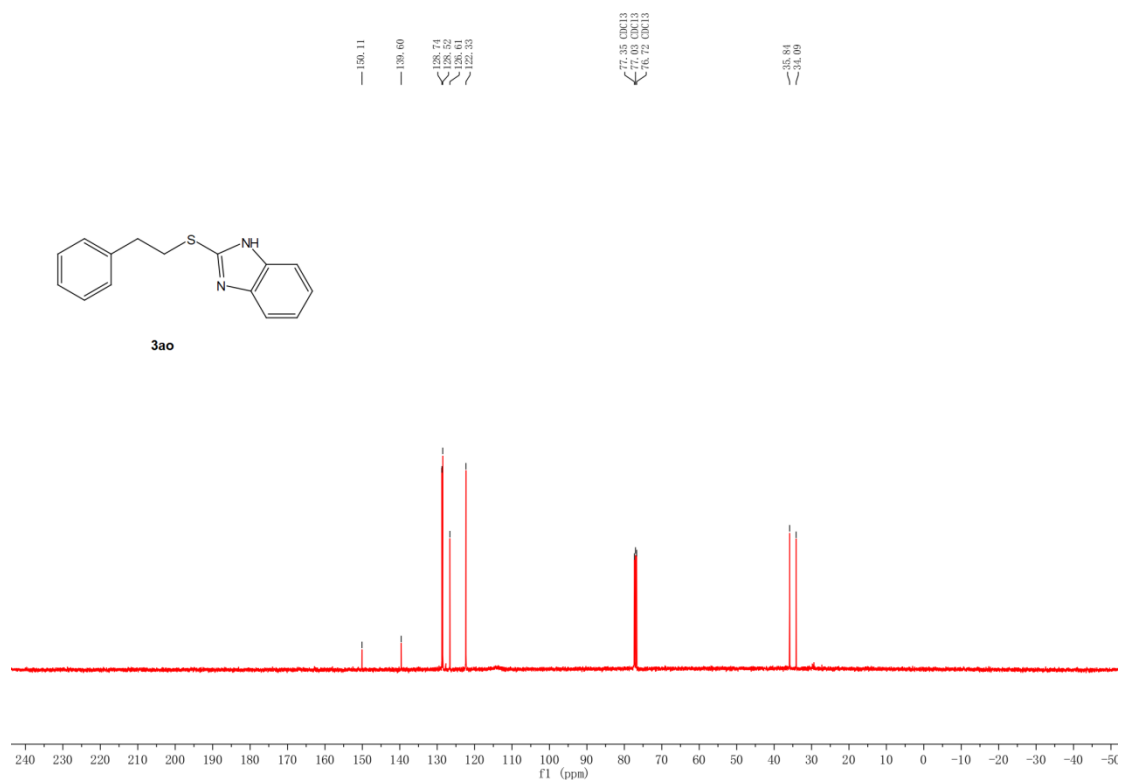

**Figure S49.** <sup>13</sup>C NMR spectra (400 MHz) of **3ao** in CDCl<sub>3</sub>.

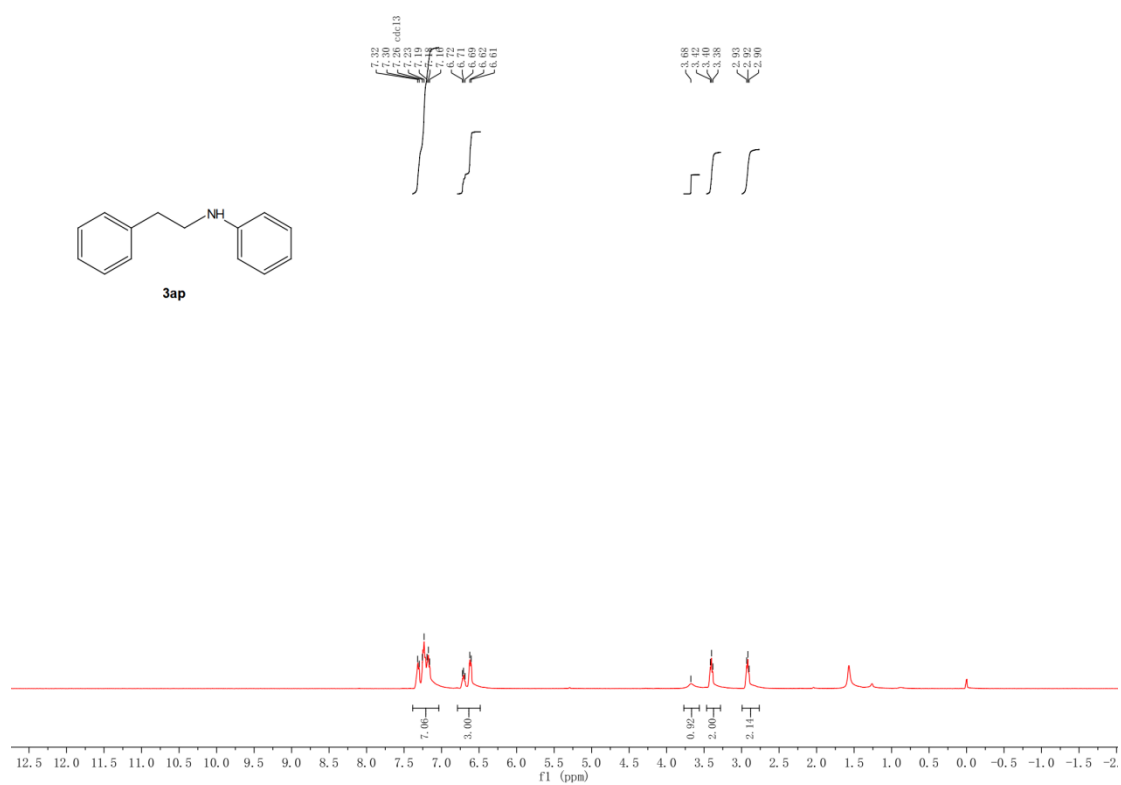

**Figure S50.** <sup>1</sup>H NMR spectra (400 MHz) of **3ap** in CDCl<sub>3</sub>.

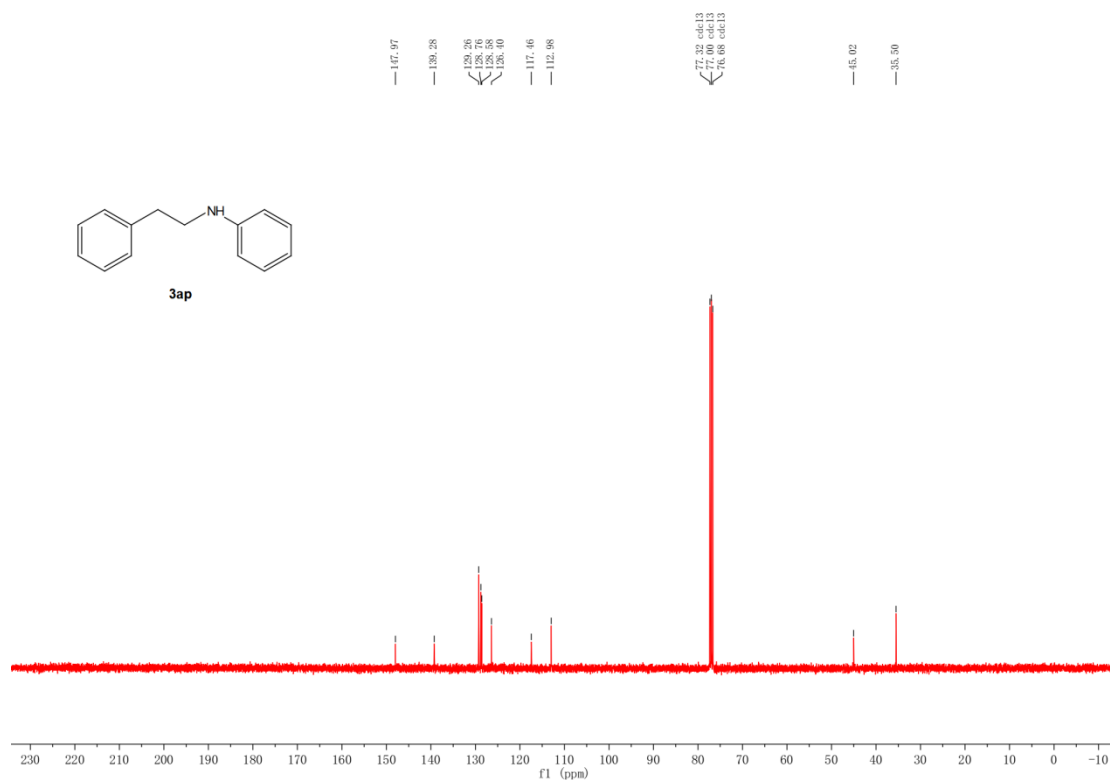

**Figure S51.**  $^{13}\text{C}$  NMR spectra (400 MHz) of **3ap** in  $\text{CDCl}_3$ .

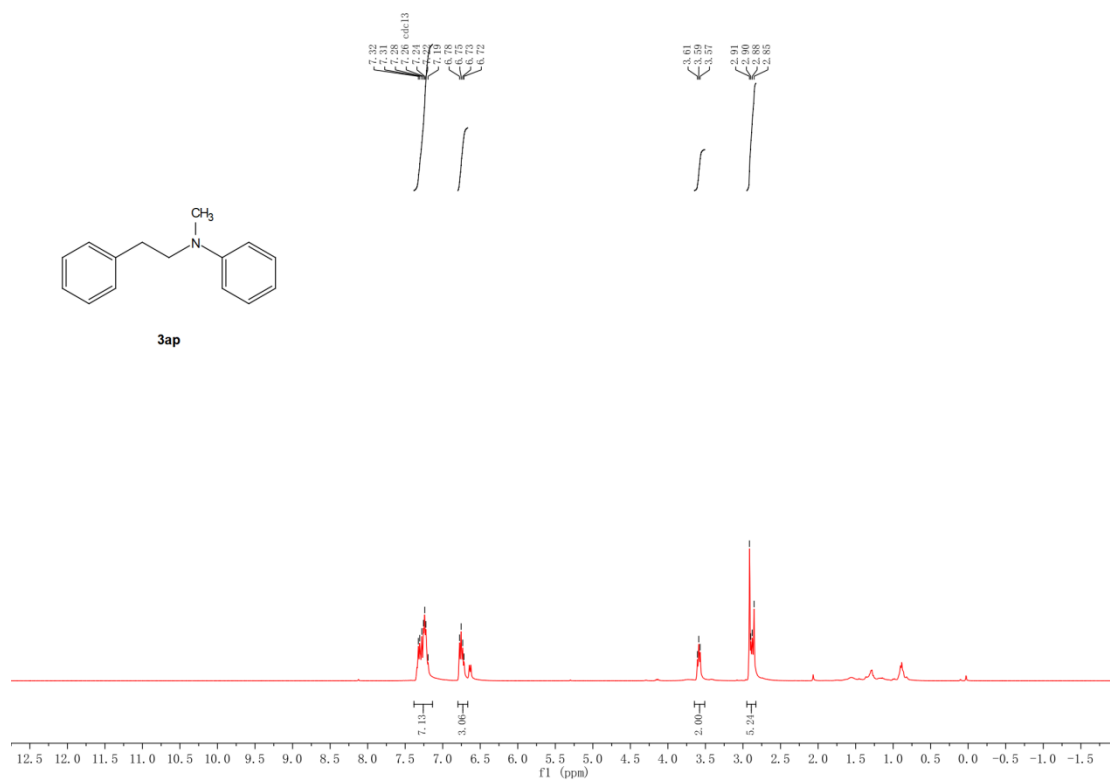

**Figure S52.**  $^1\text{H}$  NMR spectra (400 MHz) of **3aq** in  $\text{CDCl}_3$ .
